# Supplementary material for: Structure-guided optimization of small molecules targeting the yeast casein kinase, Yck2, as a therapeutic strategy to combat Candida albicans
Source: Research Square preprint supplement (doi:10.21203/rs.3.rs-5524306/v1), 2025-01-08
Supplement: Supplementary file 1 [file 348cb4b0d933b62f2871f674.docx]

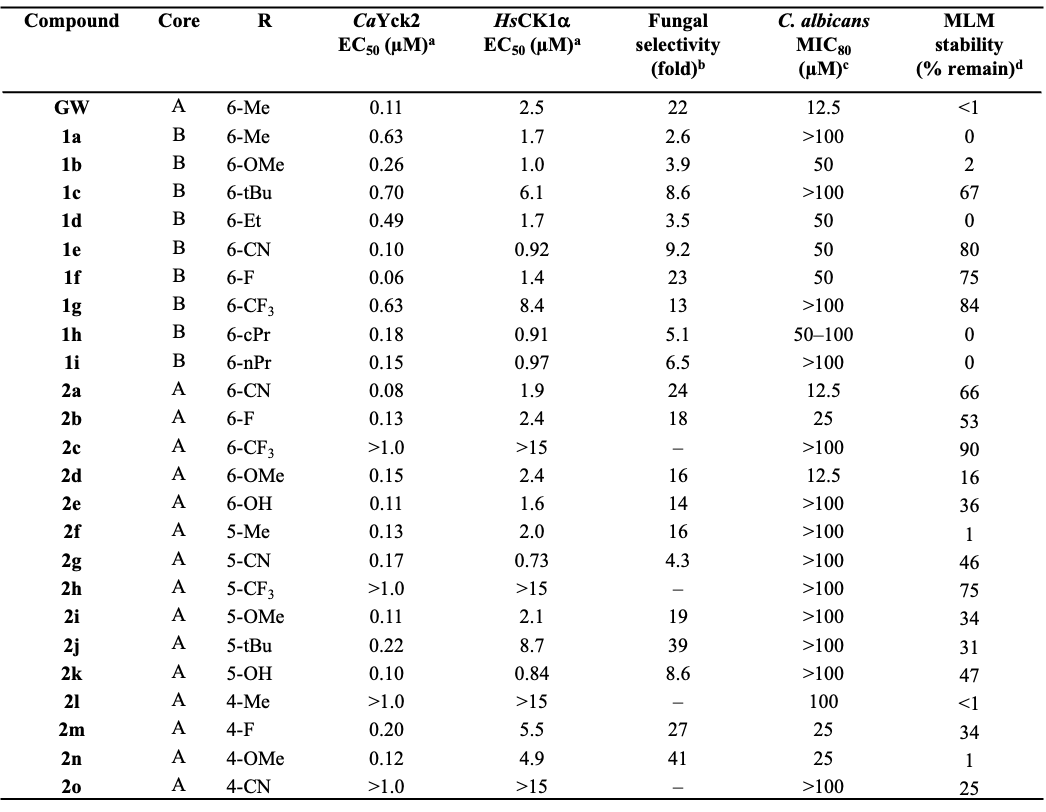


a Inhibition of kinase activity determined in two-fold dose-response assays.

b Ratio of *Hs*CK1a IC50 / *Ca*Yck2 IC50.

c Inhibition of wild type *C. albicans* fungal growth.

d Compound remaining after 30 min incubation in mouse liver microsomes (MLM) determined by LC-TOFMS.

Core A

Core B

**Table 1. Bioactivity and metabolic stability of GW analogs**
