# Supplementary material for: Structure-guided optimization of small molecules targeting the yeast casein kinase, Yck2, as a therapeutic strategy to combat Candida albicans
Source: Research Square preprint supplement (doi:10.21203/rs.3.rs-5524306/v1), 2025-01-08
Supplement: Supplementary file 2 [file 3f5e5d106c55ed7be3df5b1c.docx]

Supplementary File: Chemical Synthesis and Spectral Details

**2.1 Synthesis of GW bio-isosteres**

**General Procedure A for Synthesis of GW Bio-isostere Analogs**

A modified literature procedure was used.[[1]](#endnote-1)

**Scheme S1.** Synthesis of GW Bio-isostere Analogs

**Step 1:**Under an inert atmosphere, a solution of diisopropylamine (6.9 mL, 49 mmol, 1.5 eq) in THF (80 mL) was cooled to -78 °C, and a solution of 2.5 M n-butyllithium in hexane (20 mL, 49 mmol, 1.5 eq) was added dropwise to the solution, resulting in a colorless solution. After the addition, the solution was stirred for 15 min at -78°C. Then, a solution of 4-methylpyridine (3 g, 33 mmol, 1 eq) in THF (10 mL) was added dropwise. The resulting brownish-orange reaction mixture was allowed to warm up to rt and was stirred for 30 min, then cooled again to -78°C and a solution of 4-fluoro-N-methoxy-N-methylbenzamide (6 g, 33 mmol, 1 eq) in THF (10 ml) was added dropwise. The mixture was stirred at -78°C for 30 min. The mixture was warmed to rt and stirred for 1 h before it was cooled back to -78°C and a mixture of ethyl acetate and water was added slowly. The organic phase was separated from the aqueous phase. The aqueous phase was further extracted with ethyl acetate, and the combined organic phases were dried and concentrated to yield a crude product. This crude product was purified by silica gel flash column chromatography using a gradient of MeOH/CH2Cl2 (0–2%). The product, 1-(4-fluorophenyl)-2-(pyridin-4-yl)ethan-1-one, was obtained as a colorless solid (6 g, 85% yield). 1H NMR (400 MHz, CDCl3) δ 8.79 – 8.40 (m, 2H), 8.13 – 7.92 (m, 2H), 7.24 – 7.06 (m, 4H), 4.25 (s, 2H). 19F NMR (376 MHz, CDCl3) δ -104.02. 13C NMR (101 MHz, CDCl3) δ 194.42, 166.15 (d, *J* = 255.91 Hz), 150.13, 143.32, 132.76, 131.34, 124.96, 116.13 (d, *J* = 21.99 Hz), 44.64.

**Step 2:** 1-(4-fluorophenyl)-2-(pyridin-4-yl)ethan-1-one (4 g, 20 mmol, 1 eq) was dissolved in AcOH (40 mL) and a solution of bromine (0.9 mL, 20 mmol, 1 eq) in AcOH (6 mL) was added dropwise by means of a syringe. The reaction was stirred at rt for 45 min which resulted in complete consumption of the starting material as determined by TLC. The HBr salt of the product was observed to precipitate from the solution. EtOAc (5 mL) was added and the mixture stirred for 10 min to aid precipitation of the product. The reaction mixture was filtered, and the residue was dried to yield 2-bromo-1-(4-fluorophenyl)-2-(pyridin-4-yl)ethan-1-one as a pale brown solid (5 g, 90% yield). 1H NMR (400 MHz, CD3OD) δ 9.22 – 8.79 (m, 2H), 8.53 – 8.34 (m, 2H), 8.32 – 7.95 (m, 2H), 7.45 – 7.22 (m, 2H), 7.09 (s, 1H). 19F NMR (376 MHz, CD3OD) δ -105.07.

**Step 3:** In a reaction vial, a mixture of 2-bromo-1-(4-fluorophenyl)-2-(pyridin-4-yl)ethan-1-one (150 mg, 0.510 mmol, 1 eq) and a 4-substituted 2-aminopyridine (1.02 mmol, 2 eq) in CHCl3 (10 mL) was prepared. Titanium (IV) chloride (408 μL, 0.408 mmol, 0.8 eq, 1 M in CH2Cl2) and triethylamine (178 μL, 1.27 mmol, 2.5 eq) were added to the mixture. The reaction vial was sealed and stirred at 110°C for 16 h. After this period, the reaction color turned dark brown, and TLC indicated complete consumption of the bromoketone. 1 M K2CO3 (25 mL) and CH2Cl2 (25 mL) were added and the reaction mixure stirred for 10 min. The organic phase was separated from the aqueous phase. The aqueous phase was further extracted with CH2Cl2, and the combined organic phases were dried and concentrated to yield a crude product. This crude product was purified by flash column chromatography on silica gel using a gradient of MeOH/CH2Cl2 (0–3%).

Compounds **1a-i** were synthesized according to **General Procedure A**.

*2-(4-fluorophenyl)-7-methyl-3-(pyridin-4-yl)imidazo[1,2-a]pyridine* (**1a**)

1H NMR (850 MHz, DMSO-d6) δ 8.77 – 8.68 (m, 2H), 8.16 (dd, *J* = 7.0, 1.0 Hz, 1H), 7.60 – 7.54 (m, 2H), 7.51 – 7.48 (m, 2H), 7.47 (dq, *J* = 2.1, 1.0 Hz, 1H), 7.26 – 7.16 (m, 2H), 6.81 (dd, *J* = 7.0, 1.8 Hz, 1H), 2.39 (d, *J* = 1.2 Hz, 3H). 19F NMR (376 MHz, DMSO-d6) δ -114.16. 13C NMR (214 MHz, DMSO-d6) δ 161.78 (d, *J* = 245.2 Hz), 150.80, 145.19, 141.66, 137.19, 136.73, 130.35, 130.33, 129.87, 129.84, 124.69, 123.30, 117.51, 115.65, 115.45, 115.35, 115.26, 20.74. LCMS-ESI+ (m/z): [M+H]+ calc for C19H15FN3, 304.3; found, 304.4.

*2-(4-fluorophenyl)-7-methoxy-3-(pyridin-4-yl)imidazo[1,2-a]pyridine* (**1b**)

1H NMR (850 MHz, DMSO) δ 8.74 – 8.67 (m, 2H), 8.11 (dd, *J* = 7.5, 0.7 Hz, 1H), 7.59 – 7.51 (m, 2H), 7.51 – 7.43 (m, 2H), 7.21 – 7.14 (m, 2H), 7.08 (d, *J* = 2.6 Hz, 1H), 6.64 (dd, *J* = 7.5, 2.6 Hz, 1H), 3.87 (s, 3H). 19F NMR (376 MHz, cdcl3) δ -113.48. 13C NMR (214 MHz, DMSO) δ 161.73 (d, *J* = 245.1 Hz), 158.20, 150.76, 146.46, 141.50, 137.15, 130.43, 130.41, 129.71, 129.67, 124.77, 124.63, 116.96, 115.44, 115.34, 107.59, 94.67, 55.79. LCMS-ESI+ (m/z): [M+H]+ calc for C19H15FN3O, 320.3; found, 320.4. HPLC purity 99%.

*7-(tert-butyl)-2-(4-fluorophenyl)-3-(pyridin-4-yl)imidazo[1,2-a]pyridine* (**1c**)

1H NMR (400 MHz, CDCl3) δ 8.89 (s, 2H), 8.24 – 8.00 (m, 2H), 7.82 – 7.42 (m, 4H), 7.40 – 7.32 (m, 1H), 7.11 (t, *J* = 8.3 Hz, 2H), 1.42 (s, 9H). 19F NMR (376 MHz, CDCl3) δ -108.37 (dt, *J* = 8.4, 3.8 Hz). 13C NMR (101 MHz, cdcl3) δ 164.12 (d, *J* = 252.8 Hz), 158.18, 149.03, 142.52, 137.52, 137.50, 131.09, 131.00, 125.46, 123.19, 122.98, 122.95, 117.46, 117.07, 116.85, 116.82, 110.40, 36.03, 30.25. HRMS-ESI+ (m/z): [M+H]+ calc for C22H21FN3, 346.1719; found, 346.1712. HPLC purity >95%.

*7-ethyl-2-(4-fluorophenyl)-3-(pyridin-4-yl)imidazo[1,2-a]pyridine* (**1d**)

1H NMR (400 MHz, CDCl3) δ 8.81 – 8.60 (m, 2H), 8.01 (dd, *J* = 7.1, 1.0 Hz, 1H), 7.65 – 7.51 (m, 2H), 7.47 (dq, *J* = 2.0, 1.0 Hz, 1H), 7.41 – 7.33 (m, 2H), 7.07 – 6.97 (m, 2H), 6.70 (dd, *J* = 7.1, 1.7 Hz, 1H), 2.73 (qd, *J* = 7.5, 1.0 Hz, 2H), 1.31 (t, *J* = 7.6 Hz, 3H). 19F NMR (376 MHz, CDCl3) δ -113.75. 13C NMR (100 MHz, DMSO) δ 161.78 (d, *J* = 245.0 Hz), 150.80, 149.58, 145.23, 142.72, 141.73, 137.21, 129.87, 129.79, 124.71, 123.52, 117.54, 115.52, 115.30, 114.62, 113.94, 27.62, 14.50. LCMS-ESI+ (m/z): [M+H]+ calc for C20H17FN3, 318.2; found, 318.4. HPLC purity >95%.

*2-(4-fluorophenyl)-3-(pyridin-4-yl)imidazo[1,2-a]pyridine-7-carbonitrile* (**1e**)

1H NMR (400 MHz, CDCl3) δ 8.87 – 8.76 (m, 2H), 8.15 – 8.04 (m, 2H), 7.65 – 7.54 (m, 2H), 7.42 – 7.35 (m, 2H), 7.10 – 7.01 (m, 2H), 6.98 (dd, *J* = 7.1, 1.7 Hz, 1H). 19F NMR (376 MHz, CDCl3) δ -111.95. 13C NMR (214 MHz, DMSO) δ 162.19 (d, *J* = 246.4 Hz), 150.99, 144.30, 142.71, 136.10, 130.08, 130.04, 129.28, 129.27, 125.45, 124.91, 123.55, 120.50, 117.79, 115.74, 115.64, 113.16, 107.31. HRMS-ESI+ (m/z): [M+H]+ calc for C19H12FN4, 315.1046; found, 315.1039. HPLC purity >95%.

*7-fluoro-2-(4-fluorophenyl)-3-(pyridin-4-yl)imidazo[1,2-a]pyridine* (**1f**)

1H NMR (400 MHz, CDCl3) δ 8.83 – 8.65 (m, 2H), 8.05 (ddd, *J* = 7.6, 5.5, 0.8 Hz, 1H), 7.63 – 7.52 (m, 2H), 7.40 – 7.35 (m, 2H), 7.33 (ddd, *J* = 9.2, 2.6, 0.7 Hz, 1H), 7.09 – 6.97 (m, 2H), 6.80 – 6.69 (m, 1H). 13C NMR (126 MHz, DMSO) δ 162.28 (d, *J* = 246.3 Hz), 161.28 (d, *J* = 252.0 Hz), 158.25 (d, *J* = 36.5 Hz), 146.95, 145.42 (d, *J* = 14.3 Hz), 143.29, 140.57, 130.43 (d, *J* = 8.8 Hz), 128.76, 127.28, 127.19, 125.84, 117.60, 115.79 (d, *J* = 10.1 Hz), 105.98 (d, *J* = 29.3 Hz), 100.53 (d, *J* = 24.0 Hz). 19F NMR (376 MHz, CDCl3) δ -111.43, -113.13. LCMS-ESI+ (m/z): [M+H]+ calc for C18H12F2N3, 308.2; found, 308.3. HPLC purity >95%.

*2-(4-fluorophenyl)-3-(pyridin-4-yl)-7-(trifluoromethyl)imidazo[1,2-a]pyridine* (**1g**)

1H NMR (400 MHz, CDCl3) δ 8.86 (s, 2H), 8.22 (dt, *J* = 7.3, 0.9 Hz, 1H), 8.07 (dq, *J* = 2.0, 1.0 Hz, 1H), 7.61 – 7.46 (m, 4H), 7.13 – 6.98 (m, 3H). 19F NMR (376 MHz, CDCl3) δ -65.53, -111.78. 13C NMR (101 MHz, CDCl3) δ 163.34 (d, *J* = 249.6 Hz), 149.45, 147.84 (m), 144.16, 139.16, 132.31 (d, *J* = 8.4 Hz), 130.62, 130.54, 128.49, 128.46, 128.15, 125.07, 124.46, 123.82, 121.76, 118.97, 116.80 – 115.19 (m), 109.69 (d, *J* = 3.1 Hz). HRMS-ESI+ (m/z): [M+H]+ calc for C19H12F4N3, 358.0967; found, 358.0960. HPLC purity >95%.

*7-cyclopropyl-2-(4-fluorophenyl)-3-(pyridin-4-yl)imidazo[1,2-a]pyridine* (**1h**)

1H NMR (400 MHz, CDCl3) δ 8.82 – 8.56 (m, 2H), 7.98 (dd, *J* = 7.1, 1.0 Hz, 1H), 7.64 – 7.51 (m, 2H), 7.41 – 7.31 (m, 3H), 7.13 – 6.92 (m, 2H), 6.56 (dd, *J* = 7.2, 1.8 Hz, 1H), 1.97 (tt, *J* = 8.3, 5.0 Hz, 1H), 1.15 – 1.02 (m, 2H), 0.85 – 0.73 (m, 2H). 19F NMR (376 MHz, CDCl3) δ -113.75. 13C NMR (214 MHz, DMSO) δ 161.77 (d, *J* = 244.9 Hz), 150.79, 145.24, 143.15, 141.78, 137.20, 130.37, 130.35, 129.82, 129.78, 124.67, 123.52, 117.40, 115.45, 115.35, 112.01, 111.66, 14.93, 9.49. HRMS-ESI+ (m/z): [M+H]+ calc for C21H17FN3, 330.1406; found, 330.1401. HPLC purity >95%.

*2-(4-fluorophenyl)-7-propyl-3-(pyridin-4-yl)imidazo[1,2-a]pyridine* (**1i**)

1H NMR (400 MHz, CDCl3) δ 8.82 – 8.65 (m, 2H), 8.01 (dd, *J* = 7.0, 1.0 Hz, 1H), 7.61 – 7.51 (m, 2H), 7.46 (dq, *J* = 1.8, 0.9 Hz, 1H), 7.41 – 7.29 (m, 2H), 7.09 – 6.91 (m, 2H), 6.68 (dd, *J* = 7.1, 1.7 Hz, 1H), 2.67 (t, *J* = 7.5 Hz, 2H), 1.72 (h, *J* = 7.4 Hz, 2H), 0.99 (t, *J* = 7.3 Hz, 3H). 19F NMR (376 MHz, CDCl3) δ -113.77. 13C NMR (214 MHz, DMSO) δ 161.78 (d, *J* = 245.2 Hz), 150.79, 145.15, 141.75, 141.06, 137.20, 130.36, 130.35, 129.86, 129.82, 124.71, 123.47, 117.55, 115.46, 115.36, 114.86, 114.78, 36.48, 23.00, 13.45. HRMS-ESI+ (m/z): [M+H]+ calc for C21H19FN3, 332.1563; found, 332.1558. HPLC purity >95%.

**2.2 Synthesis of GW analogs**

*Ethyl 3-(4-fluorophenyl)propiolate* (**A**)

To a stirred solution of 1-ethynyl-4-fluorobenzene (10 g, 83.33 mmol, 1.0 eq) in THF (50 mL) at ‑78°C was added dropwise 2M Lithium diisopropyl amide (50 mL, 69.44 mmol, 1.2 eq). The reaction mixture was stirred at -78°C for 30 min before ethyl chloroformate (9.5 mL, 69.44 mmol, 1.2 eq) in THF (10 mL) was added dropwise. The reaction mixture was allowed to warm to room temperature where it was stirred for an additional 3 h. Reaction progress was monitored by TLC and LCMS. After completion of the reaction, the reaction mixture was quenched with aq. NH4Cl solution (15 mL). Cold water (100 mL) was added, and the mixture extracted with CH2Cl2 (3 × 25 mL). The combined organic extracts were washed with brine (50 mL), dried over Na2SO4, filtered, and the solvent removed under reduced pressure to afford the crude product. The resulting crude was purified by column chromatography using a gradient of EtOAC/hexane (0–11%) as eluent to yield ethyl 3-(4-fluorophenyl) propiolate (**A**) (17.8 g, 91%) as a Pale yellow solid. 1H NMR (400 MHz, CDCl3) δ: 7.61 (d, *J =* 8.0 Hz, 2H), 7.09 (d, *J =* 8.0 Hz, 2H), 4.33 - 4.28 (q, 2H), 1.37 (t, *J =* 12.0 Hz, 3H).

**General procedure B for synthesis of pyrazolo-pyridine-3-ethylcarboxylates (D1 and D2)**

**Scheme S2.** Synthesis of Pyrazolo-pyridine-3-ethylcarboxylates **D1** and **D2**.

To a stirred solution hydroxylamine‐O‐sulfonic acid (7.4 g, 65.6 mmol, 8.4 eq.) in water (8 mL), 2.5 M solution of NaHCO3 was added to adjust the pH between 5−6, followed by the dropwise addition of pyridine (**B**) (7.0 eq). The solution was stirred at 70 °C for 2 h, then cooled to rt, and the pH was again adjusted to 8–9 by adding a 2.5 M solution of NaHCO3. Subsequently, a solution of ethyl 3-(4-fluorophenyl)-propiolate(**A**) (1.5 g, 7.8 mmol, 1.0 eq.) in acetonitrile (4 mL) was added, followed by the addition of a solution NaOH (2.5 g, 64.0 mmol, 8.2 eq.) in water (4 mL). The resulting solution turned dark red, and the stirring was continued for 18 h at rt. Reaction progress was monitored by TLC and LCMS. After completion of the reaction, CH2Cl2 (25 mL) and water (25 mL) was added. The organic phase was separated from the aqueous phase. The aqueous phase was further extracted with CH2Cl2 (25 mL), the combined organic extracts were washed with brine (25 mL), dried over Na2SO4, filtered, and the solvent removed under reduced pressure to afford the crude product (mixture of isomers **D1** and **D2**) as yellow gummy solid. The crude mixture of isomers **D1** and **D2** was purified and separated using silica gel flash column chromatography with 12% EtOAc in hexanes as eluent, unless otherwise specified in the procedure, to obtain intermediates **D1** and **D2**.

**General Procedure C for Synthesis of 6-substituted GW Analogs**

**Scheme S3.** Synthesis of GW Analogs **GW**, **2b-e**, and **2l-n**

The pyrazolo-pyridine-3-ethylcarboxylate (**D1** or **D2**) (1.70 g, 5.7 mmol, 1.0 eq) was dissolved in 2 N aq NaOH (5 mL) and MeOH (5 mL). The reaction mixture was refluxed for 3 h, and the reaction progress was monitored by TLC and LC-MS. After completion, MeOH was evaporated, and the residue was treated with cold water and acidified to pH 2 using concd HCl, resulting in the formation of a white solid. This solid was filtered and dried to afford 2-(4-fluorophenyl)-6-methylpyrazolo[1,5-a]pyridine-3-carboxylic acid (**D1A** or **D2A**) as a solid.

To a stirred solution of pyrazolo-pyridine-3-carboxylic acid (**D1A** or **D2A**) (1.20 g, 3.7 mmol, 1.0 eq) in dry DMF (3 mL), NaHCO3 (1.11 g, 11.11 mmol, 3.0 eq) and *N*‐bromosuccinimide (0.519 g, 3.7 mmol, 1.0 eq) were added. The reaction mixture was stirred at rt under an inert atmosphere for 1.5 h. Reaction progress was monitored by TLC and LCMS. After completion of the reaction, the mixture was poured into ice-cold water (30 mL), to obtain a white solid. The resulting solid was filtered and washed with water to afford 3-bromo-2-(4-fluorophenyl)-6-methylpyrazolo[1,5-a]pyridine (**D1B** or **D2B**).

In a reaction vial, a mixture of Pd2(dba)3 (0.281 g, 0.29 mmol, 0.1 eq) and Xphos (0.058 g, 0.11 mmol, 0.04 eq) in 1,4-Dioxane (2.4 mL) was prepared and purged with N2 (3 times). In another reaction vial, 3-bromo-pyrazolo-pyridine (**D1B** or **D2B**) (0.940 g, 2.9 mmol, 1.0 eq), K2CO3 (0.850 g, 5.9 mmol, 2.0 eq) and 4-pyridineboronic acid (0.563 g, 4.35 mmol, 1.5 eq) in 1,4-dioxane (8 mL) and water (2 mL) was prepared and also purged with N2 (3 times). The catalyst solution, Pd2(dba)3 and Xphos in 1,4-dioxane, was then added to the reaction mixture under an inert atmosphere. Then the reaction mixture was heated at 120 °C for 18 h. Reaction progress was monitored by TLC and LCMS. After completion of the reaction, the reaction mixture was cooled at rt and filtered through celite pad. The filtrate was evaporated to afford the crude product. The crude was purified by silica gel flash column chromatography using gradient of EtOAc in hexanes (0­­–62%) to give GW Analogs **GW**, **2b-e**, and **2l-n**.

*2-(4-fluorophenyl)-6-methyl-3-(pyridin-4-yl)pyrazolo[1,5-a]pyridine* (**GW**)

The intermediates, **D1-Me** and **D2-Me** were prepared from 3-methylpyridine (5.0 g, 54.6 mmol) following General Procedure B. The crude mixture was purified, and the isomers were separated by preparative HPLC using a SUNFIRE C18 column (250 × 19 mm, 5 μm) with 0.1% formic acid in water and acetonitrile as the mobile phase at a flow rate of 12 mL/min to afford ethyl 2-(4-fluorophenyl)-6-methylpyrazolo[1,5-a] pyridine-3-carboxylate (**D1-Me**) (0.025 g, 11% yield). LCMS: m/z 299.0 [M+1]+. 1H NMR (400 MHz, CDCl3) δ : 8.39 (d, *J =* 8.0 Hz, 1H), 7.66 (dd, *J*1 *=* 8.0 Hz, *J*2 *=* 4.0 Hz, 2H), 7.13 (dd, *J =* 8.0 Hz, 3H), 6.86 (t, *J =* 12.0 Hz, 1H), 4.28 – 4.22 (m, 2H), 2.67 (s, 3H), 1.19 (t, *J =* 16.0 Hz, 3H).

**D1-Me** (1.70 g, 5.7 mmol) was then converted to 2-(4-Fluorophenyl)-6-methyl-3-(yridine-4-yl)pyrazolo[1,5-a]pyridine (**GW**) (0.056 g, 3.2% yield for 3 steps) following General Procedure C. White solid. mp 131 °C. LCMS m/z [M+H]+ 303.90. 1H NMR (400 MHz, DMSO-d6) δ: 8.66 (s, 1H), 8.56 (d, *J* = 8.0 Hz, 2H), 7.69 (d, *J* = 8.0 Hz, 1H), 7.54 (dd, *J1* = 8.0 Hz, *J2* = 2.40 Hz, 2H), 7.31 – 7.25 (m, 5H), 2.30 (s, 3H). 13C NMR (100 MHz, CDCl3) δ 163.12 (d, *J* = 247.63 Hz), 150.69, 148.40, 143.14, 138.15, 130.84, 128.75, 126.84, 124.29, 123.23, 112.26, 115.89, 106.48, 18.16. The obtained product NMR spectra was in line with the reported spectra.[[2]](#endnote-2) HRMS-ESI+ (m/z): [M+H]+ calc for C19H15FN3, 304.1250; found, 304.1244. HPLC purity >99%.

*2-(4-Fluorophenyl)-3-(pyridin-4-yl)pyrazolo[1,5-a]pyridine-6-carbonitrile* (**2a**)

To a stirred solution Hydroxylamine‐O‐sulfonic acid (6.4 g, 56.8 mmol, 8.4 eq) in water (8 mL), 2.5 M aq solution of NaHCO3 was added to adjust the pH between 5−6. 3-Iodopyridine (**E**) (5.6 g, 47.3 mmol, 7.0 eq) was added dropwise and the solution was stirred at 70 °C for 2 h, then cooled to rt, and the pH was again adjusted to 8–9 by adding a 2.5 M aq solution of NaHCO3. Subsequently, a solution of ethyl 3-(4-fluorophenyl)propiolate(**A**) (1.3 g, 6.77 mmol, 1.0 eq) in acetonitrile (4 mL) was added, followed by addition of solution fo NaOH (2.22 g, 55.5 mmol, 8.2 eq.) in water (4 mL). The resulting solution turned black, and the stirring was continued for 18 h at rt. Reaction progress was monitored by TLC and LCMS. After completion of the reaction CH2Cl2 (25 mL)and water (25 mL) was added. The organic phase was separated from the aqueous phase. The aqueous phase was further extracted with CH2Cl2 (25 mL x 3), and the combined organic extracts were washed with brine (25 mL), dried over Na2SO4, filtered, and the solvent removed under reduced pressure to afford the crude product. The crude was purified using silica gel flash column chromatography using 13% EtOAc in hexane as eluent to give **G1** as a brown solid. *Ethyl 2-(4-fluorophenyl)-6-iodopyrazolo[1,5-a] pyridine-3-carboxylate* (**G1**): 0.819 g, 42%. LCMS: m/z 411.1 [M+H] +. 1H NMR (400 MHz, CDCl3) δ: 8.79 (s, 1H), 8.01 (d, *J* = 8.0 Hz, 1H), 7.79 (t, *J* = 12.0 Hz, 2H), 7.60 (d, *J* = 8.0 Hz, 1H), 7.15 (t, *J* = 16.0 Hz, 2H), 4.36 – 4.30 (m, 2H), 1.26 (t, *J =* 16.0 Hz, 3H).

The intermediate **G1** (0.800 g, 1.9 mmol, 1.0 eq) was dissolved in 2 N aq NaOH (14 mL) and methanol (5 mL). The reaction mixture was refluxed for 3 h, and the reaction progress was monitored by TLC and LCMS. After completion, methanol was evaporated, and the residue was treated with cold water and acidified to pH 2 using concd HCl, resulting in the formation of a white solid. This solid was filtered and dried to afford 2-(4-fluorophenyl)-6-iodopyrazolo[1,5-a] pyridine-3-carboxylic acid (**G1A**) (0.648 g, 87%) as a white solid. LCMS: 381.1 m/z [M-1]-. 1H NMR (400 MHz, DMSO-d6) δ: 12.63 (s, 1H), 9.25 (s, 1H), 7.95 (d, *J* = 8.0 Hz, 1H), 7.79 (t, *J* = 20.0 Hz, 3H), 7.26 (d, *J* = 8.0 Hz, 2H).

To a stirred solution of (**G1A**) (0.640 g, 1.67 mmol, 1.0 eq) in in dry DMF (5 mL), NaHCO3 (0.422 g, 5.02 mmol, 3.0 eq) and *N*-bromosuccinimide (0.296 g, 1.67 mmol, 1.0 eq) were added. The reaction mixture was stirred at rt under an inert atmosphere for 1.5 h. Reaction progress was monitored by TLC and LCMS. After completion of the reaction, the mixture was poured into ice-cold water (30 mL), to obtain a white solid. The resulting solid was filtered and washed with water to afford 3-bromo-2-(4-fluorophenyl)-6-iodopyrazolo[1,5-a] pyridine (**G1B**) (0.565 g, 81 %). LCMS: m/z 417.0 [M+]+.

To a stirred solution of **G1B** (0.550 g, 1.31 mmol, 1.0 eq) in dry DMF (5 mL) was added Copper cyanide (0.140 g, 1.58 mmol, 1.2 eq). The reaction mixture was stirred at 120°C under an inert atmosphere for 16 h. Reaction progress was monitored by TLC and LCMS. After completion of the reaction, ice-cold water (30 mL) and EtOAc (20 mL X 3) was added to the reaction mixture. Then it was filtered through celite, the two layer obtained was separated. The organic phase was washed with brine (50 mL), dried over Sodium sulphate, filtered and the solvent was concentrated to afford a crude product. The crude was purified by silica gel flash column chromatography using 21% EtOAc in hexane as eluent to afford the product, 3-bromo-2-(4-fluorophenyl) pyrazolo[1,5-a] pyridine-6-carbonitrile (**G1C**) (0.163 g, 39%). LCMS: m/z 316.1 [M+2]+. 1H NMR (400 MHz, CDCl3) δ: 8.73 (s, 1H), 8.14 – 8.10 (m, 3H), 7.67 (d, *J* = 8.0 Hz, 1H), 7.26 – 7.22 (m, 2H).

In a reaction vial, a mixture of Pd2(dba)3 (0.046 g, 0.050 mmol, 0.1 eq) and Xphos (0.009 g, 0.020 mmol, 0.04 eq) in 1,4-Dioxane (2.4 mL), Purged with N2 (3 times). In another reaction vial, a mixture of **G1C** (0.160 g, 0.50 mmol, 1.0 eq.), K2CO3 (0.139 g, 1.01 mmol, 2.0 eq.) and 4-pyridineboronic acid (0.092 g, 0.75 mmol, 1.5 eq.) in 1,4-Dioxane (8 mL) was prepared and also purged with N2 (3 times). Then the catalyst solution, Pd2(dba)3 and Xphos in 1,4-Dioxane, was then added to the reaction mixture under an inert atmosphere. Then the reaction mixture was heated at 120 °C for 18 h. Reaction progress was monitored by TLC and LCMS. After completion of the reaction, the reaction mixture was cooled at rt and filtered through celite pad. The filtrate was evaporated to afford the crude product. The crude was purified by preparative HPLC using a SUNFIRE C18 column (250 × 19 mm, 5 μm) with 0.1% formic acid in water and acetonitrile as the mobile phase at a flow rate of 17 mL/min. The pure fraction was lyophilized to afford 2-(4-fluorophenyl)-3-(pyridin-4-yl) pyrazolo[1,5-a] pyridine-6-carbonitrile (**2a**) (0.027 g, 17%) as a white solid. mp 216 °C. LCMS: m/z 315.2 [M+H]+. 1H NMR (500 MHz, CDCl3) δ 8.91 (t, *J* = 1.2 Hz, 1H), 8.67 (d, *J* = 5.1 Hz, 2H), 7.69 (dd, *J* = 9.3, 0.9 Hz, 1H), 7.60 – 7.50 (m, 2H), 7.43 – 7.31 (m, 3H), 7.19 – 7.02 (m, 2H). 13C NMR (126 MHz, CDCl3) δ: 163.72 (d, *J* = 250.45 Hz), 154.32, 149.10, 141.63, 139.77, 134.79, 131.09 (d, *J* = 8.37 Hz), 127.08 (d, *J* = 3.26 Hz), 125.31, 124.54, 117.75, 116.33, 116.19, 116.16, 109.46, 99.04. HRMS-ESI+ (m/z): [M+H]+ calc for C19H12FN4, 315.1046; found, 315.1046.

*6-Fluoro-2-(4-fluorophenyl)-3-(pyridin-4-yl)pyrazolo[1,5-a]pyridine* (**2b**)

The intermediate, ethyl 6-fluoro-2-(4-fluorophenyl) pyrazolo[1,5-a] pyridine-3-carboxylate **D1-F** (0.286 g, 2% yield) was prepared from 3-fluoropyridine (5.0 g, 51.0 mmol) following General Procedure B. Gummy solid. LCMS: m/z = 303.27 [M+1]+. 1H NMR (400 MHz, CDCl3) δ: 8.48 – 8.46 (m, 1H), 8.24 – 8.20 (m, 1H), 7.81 – 7.76 (m, 2H), 7.39 – 7.34 (m, 1H), 7.17 – 7.12 (m, 2H), 4.36 – 4.30 (q, 2H), 1.33 (t, *J =* 16.0 Hz, 3H).

**D1-F** (0.250 g, 0.8 mmol) was then converted to 6-fluoro-2-(4-fluorophenyl)-3-(pyridin-4-yl)pyrazolo[1,5-a]pyridine (**2b**) (0.07 g, 26% yield for 3 steps) following General Procedure C. White solid. mp 155 °C. LCMS: m/z = 308.1 [M+1]+. 1H NMR (400 MHz, DMSO-d6) δ: 9.16 (s, 1H), 8.584 (s, 2H), 7.80 (t, *J* = 9.2Hz, 1H), 7.50 (t, *J* = 20.0 Hz 3H), 7.33 (s, 1H), 7.26 (t, *J* = 12.0 Hz, 3H). 13C NMR (100 MHz, DMSO-d6) δ 162.8 (d, *J* = 241.60 Hz), 153.80 (d, *J* = 233.8 Hz), 150.7 (d, *J* = 59.8 Hz), 147.8, 140.4, 137.3, 131.22 (d, *J* = 8.3 Hz), 129.0, 124.4, 118.3 – 117.2 (m), 116.8, 116.2, 116.0, 107.7. HRMS-ESI+ (m/z): [M+H]+ calc for C18H12F2N3, 308.0999; found, 308.0997. HPLC Purity >99%.

*2-(4-Fluorophenyl)-3-(pyridin-4-yl)-6-(trifluoromethyl) pyrazolo[1,5-a] pyridine* (**2c**)

The intermediate, ethyl 2-(4-fluorophenyl)-6-(trifluoromethyl) pyrazolo [1,5-a] pyridine-3-carboxylate (**D1-CF3**) (0.320 g, 17% yield) was prepared from 3-(trifluoromethyl) pyridine (3.0 g, 20.8 mmol) following General Procedure B. Gummy solid. LCMS: m/z = 353.1 [M+1]+. 1H NMR (400 MHz, CDCl3) δ: 8.88 (s, 1H), 8.35 (d, *J =* 8.0 Hz, 1H), 7.82 (d, *J =* 4.0 Hz, 2H), 7.58 (d, *J =* 8.0 Hz, 1H), 7.23 (m, 2H), 4.40 – 4.35 (m, 2H), 1.36 (t, *J =* 16.0 Hz, 3H).

**D1-CF3** (0.32 g, 3.2 mmol) was then converted 2-(4-Fluorophenyl)-3-(pyridin-4-yl)-6-(trifluoromethyl) pyrazolo[1,5-a] pyridine (**2c**) (0.12 g, 38% yield for 3 steps) following General Procedure C. White solid. mp 159 °C. LCMS: m/z = 358.0 [M+1]+. 1H NMR (400 MHz, DMSO-d6) δ: 9.50 (s, 1H), 8.61 (d, *J* = 8.0 Hz, 2H), 7.90 (d, *J* = 8.0 Hz, 1H), 7.60 – 7.53 (m, 3H), 7.36 – 7.27 (m, 4H). 13C NMR (100 MHz, CDCl3) δ 163.03 (d, *J* = 246.63 Hz), 152.80, 150.87, 139.91, 131.42, 129.07, 128.48, 125.38, 124.55, 122.69, 121.45, 118.47, 116.77 – 116.16 (m), 115. 76, 108.78. HRMS-ESI+ (m/z): [M+H]+ calc for C19H12F4N3, 358.0967; found, 358.0967. HPLC Purity >99%.

*2-(4-Fluorophenyl)-6-methoxy-3-(pyridin-4-yl) pyrazolo[1,5-a] pyridine* (**2d**)

The intermediate, ethyl 2-(4-fluorophenyl)-6-methoxypyrazolo[1,5-a] pyridine-3-carboxylate (**D1-OMe**) was prepared (0.283 g, 2% yield) from 3‐methoxypyridine (5.0 g, 54.6 mmol) following General Procedure B. Gummy solid. LCMS: m/z = 315.00 [M+1]+. 1H NMR (400 MHz, CDCl3) δ: 8.10 (d, *J =* 8.0 Hz, 2H), 7.79 (dd, *J*1 *=* 8.0 Hz, *J*2 *=* 4.0 Hz, 2H), 7.23 (d, *J =* 8.0 Hz, 1H), 7.21 – 7.12 (m, 2H), 4.35 – 4.30 (m, 2H), 3.99 (s, 3H), 1.34 (t, *J =* 16.0 Hz, 3H).

**D1-OMe** (0.230 g, 0.7 mmol) was then converted 2-(4-Fluorophenyl)-6-methoxy-3-(pyridin-4-yl) pyrazolo[1,5-a] pyridine (**2d**) (0.08 g, 30% yield for 3 steps) following General Procedure C. White solid. mp 134 °C. LCMS: m/z = 320.1 [M+1]+. 1H NMR (400 MHz, DMSO-d6) δ: 8.54 (s, 3H), 7.66 (d, *J* = 8.0 Hz, 1H), 7.53 – 7.50 (m, 2H), 7.30 – 7.23 (m, 4H), 7.18 (d, *J* = 8.0 Hz, 1H), 3.86 (s, 3H). 13C NMR (100 MHz, CDCl3) δ: 162.61 (d, *J* = 245.62 Hz), 150.50, 150.13, 149.30, 140.88, 135.70, 131.06 (d, *J* = 8.3 Hz), 129.55, 124.25, 120.97, 117.05, 115.08 (d, *J* = 21.4 Hz), 112.16, 107.00, 56.88. HRMS-ESI+ (m/z): [M+H]+ calc for C19H15FN3O, 320.1199; found, 320.1194. HPLC Purity >98%.

*2-(4-Fluorophenyl)-3-(pyridin-4-yl) pyrazolo[1,5-a] pyridin-6-ol* (**2e**)

To a stirred solution of **2d** (0.140 g, 0.43 mmol, 1.0 eq) in dry CH2Cl2 (10 mL) at 0°C, was added Boron tribromide (1 M BBr3, 0.049 mL, 0.52 mmol, 1.2 eq). The reaction mixture was stirred at rt under an inert atmosphere for 16 h. TLC and LCMS confirmed the presence of starting material and partial formation of the expected product. Therefore, the reaction mixture was cooled to 0°C, and an additional 3.6 equivalents of boron tribromide (1 M BBr3 in CH₂Cl₂, 0.147 mL, 1.56 mmol, 3.6 eq) was added. The reaction mixture was then warmed to rt and stirred for another 16 hours. After completion of the reaction, the mixture was quenched with ice-cold aqueous NaHCO₃ (30 mL), extracted with CH₂Cl₂ (2 × 30 mL), dried over Na₂SO₄, and concentrated to yield a crude product. The crude product was purified by preparative HPLC using 0.1% formic acid in water and acetonitrile, SunFire C18 (250 × 19 mm, 5 µm). The pure fraction was lyophilized to afford 2-(4-fluorophenyl)-3-(pyridin-4-yl)pyrazolo[1,5-a]pyridin-6-ol (**2e**) as a white solid (0.011 g, 8%). mp 233°C. LCMS: m/z 306.05 [M+1]+. 1H NMR (400 MHz, DMSO-d6) δ: 9.90 (s, 1H), 8.53 (d, J = 4.0 Hz, 2H), 8.21 (s, 1H), 7.65 – 7.62 (m, 1H), 7.49 (t, J = 12.0 Hz, 2H), 7.28 – 7.21 (m, 4H), 7.11 (d, J = 8.0 Hz, 1H). 13C NMR (100 MHz, DMSO-d6) δ 162.57 (d, *J* = 241.60 Hz), 150.47, 148.93, 147.44, 141.08, 135.33, 131.11 (d, *J* = 6.9 Hz), 129.69, 124.19, 121.24, 117.01, 116.03 (d, *J* = 21.3 Hz), 113.43, 106.57. HRMS-ESI+ (m/z): [M+H]+ calc for C18H13FN3O, 306.1042; found 306.1035. HPLC Purity >99%.

**General procedure D for Synthesis of 5-substituted GW analogs**

**Scheme S3.** Synthesis of GW analogs **2f**, and **h–k**.

To a stirred solution hydroxylamine‐O‐sulfonic acid (7.4 g, 65.6 mmol, 8.4 eq.) in water (8 mL), was added 2.5 M aq solution of NaHCO3 to adjust the pH between 5–6, followed by dropwise addition of 4‐substituted pyridine (**H**) (54.6 mmol, 7.0 eq). The reaction mass was stirred at 70 °C for 2 h, then cooled to rt, and the pH was again adjusted to 8−9 by adding a 2.5 M aq solution of NaHCO3. Subsequently, a solution of ethyl 3-(4-fluorophenyl)propiolate (**A**) (1.5 g, 7.8 mmol, 1.0 eq) in acetonitrile (4 mL) was added, followed by addition of a solution of NaOH (2.5 g, 64.0 mmol, 8.2 eq.) in water (4 mL). The resulting solution turned dark red, and the stirring was continued for 18 h at rt. Reaction progress was monitored by TLC and LCMS. After completion of the reaction, CH2Cl2 (25 mL) and water (25 mL) was added. The organic phase was separated from the aqueous phase. The aqueous phase was further extracted with CH2Cl2 (25 mL x 2), the combined organic extracts were washed with brine (50 mL), dried over Na2SO4, filtered, and the solvent removed under reduced pressure to afford the crude product. The resulting crude was purified using silica gel flash column chromatography using gradient of EtOAc in hexanes (0-22%) to afford intermediate ethyl 2-(4-fluorophenyl)pyrazolo[1,5-a]pyridine-3-carboxylate (**J**).

The intermediate **J** (5.0 mmol, 1.0 eq.) was dissolved in 2 N aq NaOH (5 mL) and methanol (5 mL). The reaction mixture was refluxed for 3 h, and the reaction progress was monitored by TLC and LCMS. After completion of the reaction, methanol was evaporated, and the residue was treated with cold water and acidified to pH 2 using concd HCl, resulting in the formation of a white solid. This solid was filtered and dried to afford 2-(4-fluorophenyl)-pyrazolo[1,5-a]pyridine-3-carboxylic acid (**JA**).

To a stirred solution of 2-(4-fluorophenyl)-pyrazolo[1,5-a] pyridine-3-carboxylic acid (**JA**) (4.4 mmol, 1 eq.) in DMF (5 mL), NaHCO3 (13.3 mmol, 3.0 eq) and *N*‐bromosuccinimide (4.4 mmol, 1.0 eq.) were added. The reaction mixture was stirred at rt under a inert atmosphere for 1.5 h. Reaction progress was monitored by TLC and LCMS. After completion of the reaction, the mixture was poured into ice cold water (30 mL), to obtain white solid. The resulting solid was filtered and washed with water to afford 3-bromo-2-(4-fluorophenyl)-pyrazolo[1,5-a] pyridine (**JB**).

In a reaction vial, a mixture of Pd2(dba)3 (0.31 mmol, 0.1 eq) and Xphos (0.15 mmol, 0.04 eq) in 1,4-Dioxane (2.4 mL) was prepared and purged with N2 (3 times). In another reaction vial, a mixture of 3-bromo-2-(4-fluorophenyl)-5-alkyl-pyrazolo[1,5-a] pyridine (**JB**) (3.9 mmol, 1.0 eq), K2CO3 (7.8 mmol, 2.0 eq) and 4-pyridineboronic acid (5.9 mmol, 1.5 eq) in 1,4-dioxane (8 mL) and water (2 mL) was prepared, and also purged with N2 (3 times). Then the catalyst solution, Pd2(dba)3 and Xphos in 1,4-Dioxane, was then added to the reaction mixture under an inert atmosphere. Then the reaction mixture was heated at 120 °C for 18 h. Reaction progress was monitored by TLC and LCMS. After completion of the reaction, the reaction mixture was cooled at rt and filtered through celite pad. The filtrate was evaporated to afford the crude product. The crude was purified by silica gel flash column chromatography using gradient of EtOAc in hexanes (0­­–59%) to afford 5-substituted GW analogs **2f**, and **h–k**.

*2-(4-Fluorophenyl)-5-methyl-3-(pyridin-4-yl)pyrazolo[1,5-a]pyridine* (**2f**)

The intermediate, ethyl 2-(4-fluorophenyl)pyrazolo[1,5-*a*]pyridine-3-carboxylate (**J-Me**) was prepared (1.58 g, 10% yield) from 4‐methylpyridine (5.0 g, 54.6 mmol) following General Procedure D. LCMS m/z = 299.30 [M+H]+. 1H NMR (400 MHz, CDCl3) δ: 8.41 (d, *J* = 8.0 Hz, 1H), 8.00 (s, 1H), 7.81 – 7.77 (m, 2H), 7.15 (t, *J* = 16.0 Hz, 2H), 6.82 (d, *J* = 8.0 Hz, 1H), 4.36 – 4.30 (m, 2H), 2.51 (s, 3H), 1.33 (t, *J* = 16.0 Hz, 3H).

**J-Me** (1.50 g, 5.0 mmol) was then converted 2-(4-Fluorophenyl)-5-methyl-3-(pyridin-4-yl)pyrazolo[1,5-a]pyridine (**2f**) (0.32 g, 19% yield for 3 steps) following General Procedure D. White solid. mp 172 °C. LCMS m/z = 303.9 [M+H]+. 1H NMR (400 MHz, CDCl3) δ : 8.66 (d, *J* = 8.0 Hz, 2H), 8.47 (d, *J* = 8.0 Hz, 1H), 7.63 – 7.60 (m, 2H), 7.48 (s, 1H), 7.34 (dd, *J1* = 4.0 Hz, *J2* = 8.0 Hz, 2H), 7.16 – 7.12 (m, 2H), 6.79 – 6.77 (dd, *J1* = 1.6 Hz, *J2* = 7.2 Hz, 2H),), 2.50 (s, 3H). 13C NMR (100 MHz, DMSO-d6) δ: 163.17 (d, *J* = 247.64 Hz), 151.29, 150.26, 141.72, 139.84, 136.40, 130.97 (d, *J* = 8.1 Hz), 128.82, 128.12, 124.23, 115.91, 115.69, 115.10, 106.29, 21.60. HRMS-ESI+ (m/z): [M+H]+ calc for C19H15FN3, 304.1250; found 304.1243. HPLC Purity >99%.

*Synthesis of 2-(4-fluorophenyl)-3-(pyridin-4-yl)pyrazolo[1,5-a]pyridine-5-carbonitrile* (**2g**)

**Scheme 4.** Synthesis of 5-cyano GW analog (**2g**)

To a stirred solution of 4-pyridinecarboxylic acid (5.0 g, 40.6 mmol, 1.0 eq) in acetonitrile (50 mL), *N,O*-dimethylhydroxylamine (5.15 g, 52.8 mmol, 1.3 eq), 1-(3-dimethylaminopropyl)-3-ethylcarbodiimide hydrochloride (EDC.HCl) (11.6 g, 60.9 mmol, 1.5 eq), 1-hydroxybenzotriazole Monohydrate (HOBT) (8.08 g, 52.8 mmol, 1.3 eq) and *N,N*-diisopropylethylamine (DIPEA) (21.6 mL, 121.9 mmol, 3.0 eq) were added slowly at 0°C. After completion of addition, the reaction mixture was stirred at rt for 3 h. The reaction progress was monitored by TLC and LC-MS. Upon completion, the mixture was evaporated under vacuum, then ice-cold water (30 mL) was added to the reaction mixture and extracted with ethyl acetate (30 mL). The organic layer was further washed with ice cold water (50 mL), dried (Na2SO4), filtered and the solvent was removed to afford crude product. The crude was purified using silica gel flash column chromatography using 38% EtOAc in hexanes as eluent. *N*-methoxy-N-methylisonicotinamide (**K**) was obtained as a sticky material (5.23 g, 78% yield). 1H NMR (400 MHz, DMSO-d6) δ: 8.68 (d, *J* = 4.0 Hz, 2H), 7.52 (d, *J* = 4.0 Hz, 2H), 3.55 (s, 3H), 3.27 (s, 3H).

In a round-bottom flask, a solution of *tert*-butyl ((mesitylsulfonyl)oxy)carbamate (3.3 g, 15.3 mmol, 1.0 eq) in trifluoroacetic acid (5 mL) was stirred at 0°C for 30 min. After that ice cold water was then added into the reaction mixture, resulting in the formation of a white solid. The solid was filtered and dried under vacuum. In another round-bottom flask, the dried solid (O-(mesitylsulfonyl)hydroxylamine) in CH2Cl2 (15 mL), and *N*-methoxy-*N*-methylisonicotinamide (**K**) (3.8 g, 23.0 mmol, 1.5 eq) was added at 0°C. The reaction mixture was stirred for 2 h at same temperature. Afterward, the solvent was distilled off, and the residue was dissolved in DMF (4 mL). To this, ethyl 3-(4-fluorophenyl)propiolate (**A**) (2.06 g, 10.7 mmol, 0.7 eq) and K2CO3 (4.23 g, 30.6 mmol, 2.0 eq.) were added at rt. The reaction mixture was stirred 16 h at same temperature. Reaction progress was monitored by TLC and LCMS. After completion of the reaction, the reaction mixture was quenched with ice-cold water (40 mL) and extracted with EtOAc (30 mL). The organic layer was further washed with ice-cold water (50 mL), dried (Na2SO4), filtered and the solvent was removed under reduced pressure to afford crude product. The crude was purified using silica gel flash column chromatography using 33% EtOAc in hexanes as eluent. The pure fraction was collected and concentrated under reduced pressure to afford ethyl 2-(4-fluorophenyl)-5-(methoxy(methyl)carbamoyl)pyrazolo[1,5-a]pyridine-3-carboxylate (**L**) (1.43 g, 17% yield) as a white solid. LCMS: m/z = 372.4 [M+1]+. 1H NMR (400 MHz, DMSO) δ : 8.96 – 8.94 (m, 1H), 8.39 (s, 1H), 7.85 – 7.81 (m, 2H), 7.35 – 7.30 (m, 3H), 4.29 – 4.24 (m, 2H), 3.63 (s,3H), 3.37 (s, 3H), 1.25 (t, *J* = 16.0 Hz, 3H).

To a stirred solution of (**L**) (1.2 g, 3.23 mmol, 1.0 eq) in 2 N aq NaOH (14 mL) and MeOH (5 mL) was heated at reflux for 3 h. Reaction progress was monitored by TLC and LCMS. After completion of the reaction, the mixture cooled at rt and MeOH was evaporated. Afterward, ice-cold water was added and acidified with conc HCl (pH = 2) to obtain white solid. The resulting solid was collected by filtered, dried to afford 2-(4-fluorophenyl)pyrazolo[1,5-a]pyridine-3,5-dicarboxylic acid (1.08 g, 100% yield) as a white solid. LCMS: m/z = 299.1 [M-H]+; 1H NMR (400 MHz, DMSO-d6) δ: 13.65 (s, 1H), 12.81 (s, 1H), 8.93 (d, *J* = 4.0 Hz, 1H), 8.73 (s, 1H), 7.86 – 7.83 (m, 2H), 7.50 – 7.48 (m, 1H), 7.31 (t, *J* = 20.0 Hz, 2H).

To a stirred solution of 2-(4-fluorophenyl)pyrazolo[1,5-a]pyridine-3,5-dicarboxylic acid (1.0 g, 3.3 mmol, 1.0 eq) in dry DMF (5 mL), NaHCO3 (0.839 g, 9.99 mmol, 3.0 eq) was added, followed by the addition of *N*‐bromosuccinimide (0.589 g, 3.33 mmol, 1.0 eq). The reaction mixture was stirred at rt under an inert atmosphere for 1.5 h. Reaction progress was monitored by TLC and LCMS. After completion of the reaction, the mixture was poured into ice cold water (30 mL), to obtain a white solid. The resulting solid was filtered and washed with water to afford 3-bromo-2-(4-fluorophenyl)pyrazolo[1,5-a]pyridine-5-carboxylic acid(**M**) (1.10 g, 100% yield) as a white solid. LCMS: 334.9 m/z [M+]-.

In a reaction vial, a mixture of Pd2(dba)3 (0.302 g, 0.33 mmol, 0.1 eq) and XPhos (0.110 g, 0.23 mmol, 0.04 eq) in 1,4-Dioxane (2.4 mL) was prepared and purged with an inert gas (3 times). In another reaction vial, a mixture of 3-bromo-2-(4-fluorophenyl)pyrazolo[1,5-a]pyridine-5-carboxylic acid(**M**) (1.1 g, 3.28 mmol, 1.0 eq), K2CO3 (0.906 g, 6.56 mmol, 2.0 eq), and 4-pyridineboronic acid (0.600 g, 4.92 mmol, 1.5 eq) in 1,4-dioxane (10 mL) and water (2 mL) was prepared and purged with an inert gas (3 times). Then, the catalyst solution (Pd2(dba)3 and Xphos) was added to reaction mixture under an inert atmosphere. The reaction mixture was heated at 120 °C for 18 h. Reaction progress was monitored by TLC and LCMS. After completion, the reaction mixture was cooled to room temperature, filtered through a Celite pad, and the filtrate was evaporated to yield the crude product. The crude material was purified by preparative HPLC using 0.1% FA in water and acetonitrile, on a SUNFIRE C18 (250 × 19 mm, 5 µm) column, with a flow rate of 17 mL/min. The pure fraction was lyophilized to afford 2-(4-fluorophenyl)-3-(pyridin-4-yl)pyrazolo[1,5-a]pyridine-5-carboxylic acid (**N**) (0.038 g, 4% yield) as a white solid. mp 256°C. 1H NMR (400 MHz, DMSO-d6) δ: 13.59 (bs, 1H), 8.91 (d, *J* = 4.0 Hz, 1H), 8.64 (d, *J* = 4.0 Hz, 2H), 8.19 (s, 1H), 7.59 – 7.56 (m, 2H), 7.42 – 7.39 (m, 3H), 7.32 – 7.27 (m. 2H). 13C NMR (100 MHz, DMSO-d6) δ: 165.22 (d, *J* = 146.3 Hz), 162.03, 159.17, 158.83, 153.14, 150.04, 142.00, 139.08, 131.89, 131.81, 130.22, 129.85, 127.58, 126.32, 118.93, 118.02, 116.69, 116.47, 115.10, 113.96, 112.19, 107.89. LCMS-ESI+ (m/z): [M+H]+ Calculated for C19H12FN3O2 = 333.32; found = 334.3.

To a stirred solution of 2-(4-fluorophenyl)-3-(pyridin-4-yl)pyrazolo[1,5-a]pyridine-5-carboxylic acid (**N**) (0.8 g, 2.40 mmol, 1.0 eq) in DMF (8 mL), 1-[bis(dimethylamino)methylene]-1H-1,2,3-triazolo[4,5-b]pyridinium 3-oxide hexafluorophosphate (HATU) (1.37 g, 3.60 mmol, 1.5 eq), triethylamine (TEA) (6.45 mL, 48.0 mmol, 20.0 eq) and ammonium chloride (NH4Cl) (0.636 g, 12.0 mmol, 5.0 eq) was added at 0°C. After completion of addition, the reaction mixture was stirred at rt for 1 h. Reaction progress was monitored by TLC and LCMS. After completion of the reaction, the reaction mixture was quenched with ice-cold water (20 mL) and extracted with EtOAc (30 mL). The organics were further washed with ice cold water (20 mL), dried over (Na2SO4), filtered and the solvent was removed under reduced pressure to afford crude intermediate which was purified by Prep HPLC using 0.1 % FA in water and Acetonitrile, SUNFIRE C18(250*19) mm,5µ. The pure fraction was lyophilized to afford 2-(4-fluorophenyl)-3-(pyridin-4-yl)pyrazolo [1,5-a]pyridine-5-carboxamide (0.320 g, 40% yield) as a yellow solid. mp 254°C. 1H NMR (400 MHz, DMSO-d6) δ: 8.88 (d, *J* = 8.0 Hz, 1H), 8.63 – 8.61 (m, 2H), 8.33 (s, 1H), 8.24 (s, 1H), 7.67 (s, 1H), 7.58 – 7.54 (m, 2H), 7.45 – 7.43 (m, 1H), 7.39 – 7.38 (m. 2H), 7.31 – 7.26 (m, 2H). 13C NMR (100 MHz, DMSO-d6) δ: 165.46 (d, *J* = 198.4 Hz), 162.03, 159.50, 159.13, 158.75, 158.37, 153.25, 150.32, 141.68, 139.12, 133.34, 131.85, 131.77, 129.96, 127.82, 126.14, 119.89, 117.02, 116.58, 116.37, 116.30, 114.15, 113.49, 111.28, 107.18. LCMS-ESI+ (m/z): [M+H]+ Calculated for C19H13FN4O = 332.34; found = 333.3.

To a stirred solution of 2-(4-fluorophenyl)-3-(pyridin-4-yl)pyrazolo [1,5-a]pyridine-5-carboxamide (0.250 g, 0.75 mmol, 1.0 eq) in dried CH2Cl2 (15 mL), POCl3 (0.140 mL, 1.50 mmol, 2.0 eq) was added at 0°C. Afterward, the reaction mixture was stirred at rt for 6 h. After completion of the reaction, the reaction mixture was quenched with cold-water (10 mL), neutralized with aq NaHCO3 (10 mL) and extracted with EtOAc (2 X 15 mL). The organic layer was concentrated under reduced pressure to afford crude product. The crude was purified using silica gel flash column chromatography using 41% EtOAc in hexanes as eluent. The pure fraction was collected and concentrated under reduced pressure to afford 2-(4-fluorophenyl)-3-(pyridin-4-yl)pyrazolo[1,5-a]pyridine-5-carbonitrile (**2g**) (0.038, 16% yield) as a white solid. mp 213°C; 1H NMR (400 MHz, CDCl3) δ: 8.60 (d, *J* = 4.0 Hz, 3H), 8.02 – 8.01 (m, 1H), 7.59 – 7.55 (m, 2H), 7.30 – 7.27 (m, 2H), 7.13 – 7.08 (m, 2H), 7.02 – 7.00 (m, 1H). 13C NMR (100 MHz, CDCl3) δ: 163.44 (d, *J* = 248.2 Hz), 152.52, 149.91, 140.43, 138.03, 130.87 (*d*, *J* = 8.2 Hz), 129.74, 127.21, 124.24, 123.25, 117.06, 116.04 (*d*, *J* = 21.6 Hz), 112.77, 110.30, 108.69. LCMS-ESI+ (m/z): [M+H]+ Calculated for C19H11FN4 = 314.32; found = 315.3. HRMS-ESI+ (m/z): [M+H]+ Calculated for C19H11FN4 = 315.1046; found = 315.1039. HPLC Purity >95%.

*2-(4-Fluorophenyl)-3-(pyridin-4-yl)-5-(trifluoromethyl) pyrazolo [1,5-a] pyridine* (**2h**)

The intermediate, ethyl 2-(4-fluorophenyl)pyrazolo[1,5-*a*]pyridine-3-carboxylate (**J-CF3**) was prepared (0.715 g, 78% yield) from 4‐trifluoromethylpyridine (2.67 g, 18.2 mmol) following General Procedure D.Off white solid. LCMS m/z = 353.1 [M+H]+. 1H NMR (400 MHz, CDCl3) δ : 8.64 (d, *J* = 8.0 Hz, 1H), 8.57 (s, 1H), 7.85 – 7.81 (m, 2H), 7.21 – 7.16 (m, 3H), 4.41 – 4.36 (m, 2H), 1.37 (t, *J* = 16.0 Hz, 3H).

**J-CF3** (0.700 g, 1.9 mmol) was then converted 2-(4-Fluorophenyl)-3-(pyridin-4-yl)-5-(trifluoromethyl) pyrazolo [1,5-a] pyridine (**2h**) (0.28 g, 40% yield for 3 steps) following General Procedure D. White solid. mp 206 °C. LCMS m/z = 358.0 [M+2]+. 1H NMR (400 MHz, DMSO-d6) δ: 9.04 (d, *J* = 8.0 Hz, 1H), 8.61 (d, *J* = 4.0 Hz, 2H), 8.03 (s, 1H), 7.57 – 7.53 (m, 2H), 7.38 (d, *J* = 4.0 Hz, 2H), 7.28 (t, *J* = 16.0 Hz, 3H). 13C NMR (100 MHz, DMSO-d6) δ 163.3 (d, *J* = 247.64 Hz), 159.45 – 158.74 (m), 153.40, 149.84, 141.87, 138.45, 131.87 (d, *J* = 8.3 Hz), 131.42, 128.23, 127.40, 117.46, 116.56 (d, *J* = 21.7 Hz), 115.47, 114.57, 110.43, 108.09. HRMS-ESI+ (m/z): [M+H]+ calc for C19H12F4N3, 358.0967; found 358.0967. HPLC Purity >99%.

*2-(4-Fluorophenyl)-5-methoxy-3-(pyridin-4-yl) pyrazolo [1,5-a] pyridine* (**2i**)

The intermediate, ethyl 2-(4-fluorophenyl)pyrazolo[1,5-*a*]pyridine-3-carboxylate (**J-OMe**) was prepared (0.26 g, 3% yield) from 4‐methoxylpyridine (4.76 g, 43.7 mmol,) following General Procedure D.White solid. LCMS m/z = 314.7 [M+H]+. 1H NMR (400 MHz, CDCl3) δ: 8.34 (d, *J* = 8.0 Hz, 1H), 7.78 – 7.75 (m, 2H), 7.53 (d, *J* = 4.0 Hz, 1H), 7.15 (t, *J* = 16.0 Hz, 2H), 6.68 – 6.65 (m, 1H), 4.34 – 4.28 (m, 2H), 3.97 (s, 3H), 1.28 (t, *J* = 16.0 Hz, 3H).

**J-OMe** (0.25 g, 0.7 mmol) was then converted 2-(4-fluorophenyl)-5-methoxy-3-(pyridin-4-yl) pyrazolo [1,5-a] pyridine (**2i**) (0.07 g, 30% yield for 3 steps) following General Procedure D. White solid. mp 168 °C. LCMS m/z = 320.9 [M+1]+. 1H NMR (400 MHz, DMSO-d6) δ: 8.66 (d, J = 8.0 Hz, 1H), 8.54 (d, J = 8.0 Hz, 2H), 7.51 – 7.48 (m, 2H), 7.30 – 7.22 (m, 4H), 6.98 (d, J = 4.0 Hz, 1H), 6.72 (dd, J1 = 4.0 Hz, J2 = 8.0 Hz, 1H), 3.87 (s, 3H). 13C NMR (100 MHz, DMSO-d6) δ 162.7 (d, *J* = 246.63 Hz), 158.25, 151.46, 150.27, 141.27, 140.44, 131.25 (d, *J* = 8.1 Hz), 130.53, 129.24, 124.21, 116.05 (d, *J* = 21.4 Hz), 108.21, 105.85, 93.85, 56.25. HRMS-ESI+ (m/z): [M+H]+ calc for C19H15FN3O, 320.1199; found 320.1197. HPLC Purity >99%.

*5-(Tert-butyl)-2-(4-fluorophenyl)-3-(pyridin-4-yl)pyrazolo[1,5-a]pyridine* (**2j**)

The intermediate, ethyl 2-(4-fluorophenyl)pyrazolo[1,5-*a*]pyridine-3-carboxylate (**J-tBu**) was prepared (1.37 g, 10% yield) from 4-tert-Butylpyridine (5.9 g, 43.7 mmol) following General Procedure D.White solid. LCMS: m/z = 341.3 [M+1]+. 1H NMR (400 MHz, CDCl3) δ: 8.45 (d, *J* = 8.0 Hz, 1H), 8.18 (s, 1H), 7.81 – 7.78 (m, 2H), 7.16 (t, *J* = 16.0 Hz, 2H), 7.04 (d, *J* = 8.0 Hz, 1H),4.36 – 4.31 (m, 2H), 1.29 (t, *J* = 16.0 Hz, 3H), 1.22 (s, 9H).

**J-tBu** (1.37 g, 4.3 mmol) was then converted 5-(tert-butyl)-2-(4-fluorophenyl)-3-(pyridin-4-yl)pyrazolo[1,5-a]pyridine (**2j**) (0.046 g, 3% yield for 3 steps) following General Procedure D. White solid. mp 195 °C. LCMS m/z = 345.9 [M+H]+. 1H NMR (400 MHz, DMSO) δ: 8.72 (d, *J* = 8.0 Hz, 1H), 8.56 (d, *J* = 4.0 Hz, 2H), 7.53 – 7.48 (m, 3H), 7.31 (d, *J* = 4.0 Hz, 2H), 7.25 (t, *J* =20.0 Hz, 2H), 7.16 (d, *J* = 8.0 Hz, 1H), 1.32 (s, 9H). 13C NMR (100 MHz, DMSO-d6) δ 162.7 (d, *J* = 245.62 Hz), 150.75, 150.57, 149.59, 141.04, 139.10, 131.25 (d, *J* = 8.3 Hz), 129.42, 128.90, 124.37, 116.08 (d, *J* = 21.4 Hz), 113.28, 110.73, 106.71, 35.21, 30.49. HRMS-ESI+ (m/z): [M+H]+ calc for C22H21FN3, 346.1719; found 346.1713. HPLC Purity >98%.

*2-(4-Fluorophenyl)-3-(pyridin-4-yl)pyrazolo[1,5-a]pyridin-5-ol* **(2k)**

5-Hydroxy GW analog (**2k**) was synthesized (0.01 g, 8% yield) from 5-methoxy GW analog (**2i**) (0.130 g, 0.60 mmol) by following the synthetic procedure similar to that of 6-hydroxy GW analog (**2e**). White solid. mp 192°C. LCMS: m/z = 306.2 [M+1]+. 1H NMR (400 MHz, DMSO-d6) δ: 10.53 (s, 1H), 8.62 (d, J = 8.0 Hz, 1H), 8.53 (d, J = 4.0 Hz, 2H), 7.52 – 7.49 (m, 2H), 7.27 – 7.22 (m, 4H), 6.90 (d, J = 4.0 Hz, 1H), 6.65 – 6.63 (m, 1H). 13C NMR (100 MHz, DMSO-d6) δ: 162.08 (d, *J* = 225.49 Hz), 156.14, 150.81, 149.90, 140.97, 140.59, 131.72 (d, *J* = 8.0 Hz), 130.40, 129.11, 123.42, 115.52 (d, *J* = 21.0 Hz), 107.69, 103.943, 95.87. HRMS-ESI+ (m/z): [M+H]+ calc for C18H13FN3O, 306.1042; found 306.1035. HPLC Purity >99%.

*2-(4-Fluorophenyl)-4-methyl-3-(yridine-4-yl) pyrazolo [1,5-a] pyridine* (**2l**)

The intermediates, **D1-Me** and **D2-Me** were prepared from 3-methylpyridine (5.0 g, 54.6 mmol) following General Procedure B. The crude mixture was purified, and the isomers were separated by preparative HPLC using a SUNFIRE C18 column (250 × 19 mm, 5 μm) with 0.1% formic acid in water and acetonitrile as the mobile phase at a flow rate of 12 mL/min to afford ethyl 2-(4-fluorophenyl)-4-methylpyrazolo[1,5-a] pyridine-3-carboxylate (**D2-Me**) (0.06 g, 24% yield). LCMS: m/z 299.0 [M+1]+. 1H NMR (400 MHz, CDCl3) δ: 8.33 (s, 1H), 8.11 (d, *J* = 8.0 Hz, 1H), 7.81 – 7.77 (m, 2H), 7.28 (dd, *J1* = 8.0 Hz, *J2* = 4.0 Hz, 1H), 7.15 (t, *J* = 20.0 Hz, 2H), 4.35 – 4.30 (m, 2H), 2.41 (s, 3H), 1.35 (t, *J* = 16.0 Hz, 3H).

**D2-Me** (1.70 g, 5.7 mmol) was then converted to 2-(4-Fluorophenyl)-4-methyl-3-(pyridin-4-yl) pyrazolo [1,5-a] pyridine (**2l**) (0.22 g, 13% yield for 3 steps) following General Procedure C.White solid. mp 159 °C. LCMS: m/z 303.98 [M+1]+. 1H NMR (400 MHz, DMSO-d6) δ: 8.65 (d, J = 8.0 Hz, 2H), 8.42 (d, J = 8.0 Hz, 1H), 7.45 – 7.41 (m, 2H), 7.33 (dd, J1 = 4.0 Hz, J2 = 8.0 Hz, 2H), 7.02 – 6.98 (m, 2H), 6.93 (t, J = 16.0 Hz, 1H), 6.79 – 6.76 (m, 1H), 2.13 (s, 3H). 13C NMR (100 MHz, CDCl3) δ 162.81 (d, *J* = 247.63 Hz), 150.43, 149.42, 143.22, 130.87 (d, *J* = 8.1 Hz), 128.30, 127.11, 126.64, 124.54, 115.43 (d, *J* = 21.3 Hz), 112.26, 108.39, 19.81. HRMS-ESI+ (m/z): [M+H]+ calc for C19H15FN3, 304.1250; found, 304.1242.

*4-Fluoro-2-(4-fluorophenyl)-3-(pyridin-4-yl) pyrazolo [1,5-a] pyridine* (**2m**)

The intermediate, ethyl 4-fluoro-2-(4-fluorophenyl) pyrazolo[1,5-a] pyridine-3-carboxylate **D2-F** (1.36 g, 9% yield) was prepared from 3-fluoropyridine (5.0 g, 51.0 mmol) following General Procedure B. Gummy solid. LCMS: m/z = 303.2 [M+1]+; 1H NMR (400 MHz, CDCl3) δ: 8.38 (d, *J* = 4.0 Hz, 1H), 7.76 – 7.72 (m, 2H), 7.18 – 7.07 (m, 3H), 6.92 – 6.87 (m, 1H), 4.33 – 4.28 (m, 2H), 1.28 (t, *J* = 12.0 Hz, 3H).

**D2-F** (1.3 g, 5.02 mmol) was then converted to 4-fluoro-2-(4-fluorophenyl)-3-(pyridin-4-yl)pyrazolo[1,5-a]pyridine (**2m**) (0.31 g, 26% yield for 3 steps) following General Procedure C. White solid. mp 169 °C. LCMS: m/z [M+1]+ 307.80. 1H NMR (400 MHz, DMSO-d6) δ: 8.72 (d, *J* = 8.0 Hz, 1H), 8.57 (d, *J* = 4.0 Hz, 2H), 7.48 – 7.44 (m, 2H), 7.33 (t, *J* = 4.0 Hz, 2H), 7.27 - 7.24 (m, 3H), 7.03 (d, *J* = 8.0 Hz, 1H). 13C NMR (100 MHz, DMSO-d6) δ 162.30 (d, *J* = 246.63 Hz), 152.92 (d, *J* = 248.20 Hz), 149.97, 149.45, 139.79, 131.06-130.77 (m), 128.05, 125.87, 125.50, 115.64 (d, *J* = 21.5 Hz), 112.02 (d, *J* = 7.3 Hz), 108.71, 108.54, 106.44. HRMS-ESI+ (m/z): [M+H]+ calc for C18H12F2N3, 308.0999; found, 308.0994. HPLC Purity >99%.

2-(4-Fluorophenyl)-4-methoxy-3-(pyridin-4-yl) pyrazolo[1,5-a] pyridine (**2n**)

The intermediate, **D2-OMe** (2.36 g, 16% yield) was prepared from 3‐methoxypyridine (5.0 g, 54.6 mmol) following General Procedure B. Gummy solid. LCMS: m/z = 315.0 [M+1]+. 1H NMR (400 MHz, CDCl3) δ: 8.19 (d, *J* = 4.0 Hz, 1H), 7.77 (t, *J* = 16.0 Hz, 2H), 7.16 (t, *J* = 12.0 Hz, 2H), 6.85 (t, *J* = 12.0 Hz, 1H), 6.62 (d, *J* = 8.0 Hz, 1H), 4.38 – 4.33 (m, 2H), 4.06 (s, 3H), 1.32 (t, *J* = 20.0 Hz, 3H).

**D2-OMe** (2.3 g, 7.32 mmol) was then converted 2-(4-fluorophenyl)-4-methoxy-3-(pyridin-4-yl) pyrazolo[1,5-a] pyridine (**2n**) (0.465 g, 21% yield for 3 steps) following General Procedure C.White solid. mp 172 °C. LCMS: m/z = 320.00 [M+1]+. 1H NMR (400 MHz, DMSO-d6) δ: 8.53 (d, *J* = 8.0 Hz, 2H), 8.18 (d, *J* = 8.0 Hz, 1H), 7.44 – 7.41 (m, 2H), 7.28 – 7.25 (m, 2H), 7.01 (t, *J* = 16.0 Hz, 2H), 6.78 – 6.74 (m, 1H), 6.46 (d, J = 8.0 Hz, 1H), 3.80 (s, 3H). 13C NMR (100 MHz, CDCl3) δ 162.80 (d, *J* = 246.30 Hz), 151.79, 150.38, 148.90, 141.76, 132.88, 130.81 (d, *J* = 8.0 Hz), 128.53, 126.51, 121.82, 115.47 (d, *J* = 21.4 Hz), 112.05, 108.21, 100.83, 55.45. HRMS-ESI+ (m/z): [M+H]+ calc for C19H15FN3O, 320.1199; found, 320.1194. HPLC Purity >99%.

*2-(4-fluorophenyl)-3-(pyridin-4-yl)pyrazolo[1,5-a]pyridine-4-carbonitrile* (**2o**)

**Scheme 5.** Synthesis of 4-cyano GW analog (**2o**).

To a stirred solution Hydroxylamine‐O‐sulfonic acid (19.77 g, 172.9 mmol, 8.4 eq) in water (20 mL) and the pH was adjusted to 5−6 by the addition of a 2.5 M solution of aq NaHCO3. 3-Iodopyridine (**O**) (16.47 g, 145.8 mmol, 7.0 eq) was added dropwise and the solution was stirred at 70 °C for 2 h. After cooling at room temperature, the solution was neutralized to pH 8−9 by the addition of a 2.5 M solution of aq NaHCO3. Then, a solution of ethyl 3-(4-fluorophenyl)propiolate (**A**) (4.0 g, 20.8 mmol, 1.0 eq) in acetonitrile (10 mL) was added, followed by a solution of NaOH (6.99 g, 174.9 mmol, 8.2 eq) in water (8 mL). The resulting solution turned black, and the stirring was continued for 18 h at rt. After completion of the reaction, the reaction mixture was diluted with CH2Cl2 (25 mL X 3) and layers were separated. The combined organic layer was washed with brine (50 mL), dried (Na2SO4), filtered and the solvent was removed under reduced pressure to afford crude. The resulting crude was purified using silica gel flash column using 13% EtOAc in n-hexane as eluent. The pure fraction was collected and concentrated under reduced pressure to afford ethyl 2-(4-fluorophenyl)-4-iodopyrazolo[1,5-a] pyridine-3-carboxylate (**P**) (2.1 g, 24% yield) as a brown solid. LCMS: m/z = 410.9 [M+1]+; 1H NMR (400 MHz, CDCl3) δ: 8.51 (d, *J* = 8.0 Hz, 1H), 7.82 – 7.79 (m, 3H), 7.18 – 7.13 (m, 2H), 6.63 (t, J = 12.0 Hz, 1H), 4.42 – 4.37 (m, 2H), 1.34 (t, *J* = 12.0 Hz, 3H),

To a stirred solution of ethyl 2-(4-fluorophenyl)-4-iodopyrazolo[1,5-a] pyridine-3-carboxylate (**P**) (2.0 g, 4.8 mmol, 1.0 eq) in dioxane (12 mL), vinyl boron trifluoro potassium (1.12 g, 7.33 mmol, 1.5 eq) and K2CO3 (1.346 g, 9.77 mmol, 2.0 eq) were added and the reaction mixture was purged with an inert gas (3 times). After completion of purging, PdCl2(dppf).DCM (0.137 g, 0.048 mmol, 0.1 eq) was added into the reaction mixture. The reaction was stirred at 110°C for 16 h. Afterward, the reaction mixture was filtered through celite, washed with EtOAc (20 mL). The filtrated was evaporated to afford crude which was purified using silica gel flash column chromatography using 11% EtOAc in hexanes as eluent to afford 2-(4-fluorophenyl)-4-vinylpyrazolo[1,5-a]pyridine-3-carboxylate (**Q**) (1.14 g, 72% yield) as brown sticky solid. LCMS: m/z 311.2 [M+1]+; 1H NMR (400 MHz, CDCl3) δ: 8.49 (d, *J* = 8.0 Hz, 1H), 7.70 – 7.68 (m, 2H), 7.57 – 7.50 (m, 2H), 7.15 (t, *J* = 12.0 Hz, 2H), 6.98 (t, *J* = 12.0 Hz, 1H), 5.80 – 5.76 (m, 1H), 5.49 – 5.46 (m, 1H), 4.30 – 4.24 (m, 2H), 1.19 (t, *J* = 12.0 Hz, 3H).

To a stirred solution of 2-(4-fluorophenyl)-4-vinylpyrazolo[1,5-a]pyridine-3-carboxylate (**Q**) (1.10 g, 3.5 mmol, 1.0 eq) in 2 N aq NaOH (14 mL) and MeOH (5 mL) was heated at reflux for 3 h. Afterward, MeOH was evaporated, cold water was added and acidified with conc HCl (pH = 2) to obtain white solid which was filtered, and dried to afford 2-(4-fluorophenyl)-4-vinylpyrazolo[1,5-a]pyridine-3-carboxylic acid (1.03 g, 100% yield) as a white solid. LCMS: 283.2 m/z [M-1]-; 1H NMR (400 MHz, DMSO-d6) δ: 12.82 (s, 1H), 8.77 (d, *J* = 4.0 Hz, 2H), 7.72 – 7.63 (m, 3H), 7.50 – 7.43 (m, 1H), 7.31 (t, *J* = 16.0 Hz, 2H), 7.18 – 7.10 (m, 1H), 5.90 – 5.86 (m, 1H), 5.45 – 5.42 (m, 1H).

To a stirred solution of 2-(4-fluorophenyl)-4-vinylpyrazolo[1,5-a]pyridine-3-carboxylic acid (1.0 g, 3.5 mmol, 1.0 eq) in DMF (5 mL), NaHCO3 (0.893 g, 10.6 mmol, 3.0 eq) and *N*‐bromosuccinimide (0.627 g, 3.5 mmol, 1.0 eq) were added and the mixture was stirred at rt under inert atmosphere for 1.5 h. Then, the mixture was poured into ice cold water (30 mL), to obtain white solid which was filtered and washed with water to afford 3-bromo-2-(4-fluorophenyl)-4-vinylpyrazolo[1,5-a]pyridine (0.628 g, 56% yield). LCMS: m/z 317.2 [M+]+. 1H NMR (400 MHz, CDCl3) δ : 8.73 (d, *J* = 8.0 Hz, 1H), 7.92 (t, *J* = 16.0 Hz, 2H), 7.81 – 7.74 (m, 1H), 7.51 (d, *J* = 8.0 Hz, 1H), 7.40 – 7.35 (m, 2H), 7.02 (t, *J* = 16.0 Hz, 1H), 5.92 – 5.88 (m, 1H), 5.54- 5.51(m, 1H).

In a reaction vial, a mixture of Pd2(dba) (0.178 g, 0.19 mmol, 0.1 eq) and XPhos (0.037 g, 0.078 mmol, 0.04 eq) in 1,4-Dioxane (2.4 mL) was prepared and purged with an inert gas (3 times). In another reaction vial, a mixture of 3-bromo-2-(4-fluorophenyl)-4-vinylpyrazolo[1,5-a]pyridine (0.620 g, 1.95 mmol, 1.0 eq), K2CO3 (0.539 g, 3.91 mmol, 2.0 eq), and 4-pyridineboronic acid (0.357 g, 2.93 mmol, 1.5 eq) in 1,4-dioxane (10 mL) and water (2 mL) was prepared and purged with an inert gas (3 times). Then, the catalyst solution (Pd2(dba)3 and Xphos) was added to reaction mixture under an inert atmosphere. The reaction mixture was heated at 120 °C for 18 h. Reaction progress was monitored by TLC and LCMS. After completion, the reaction mixture was cooled to room temperature, filtered through a Celite pad, and the filtrate was evaporated to yield the crude product. The resulting crude was purified using silica gel flash column chromatography uisng 59% EtOAc in hexanes as eluent to afford 2-(4-fluorophenyl)-3-(pyridin-4-yl)-4-vinylpyrazolo[1,5-a]pyridine (**R**) (0.220 g, 36% yield) as a white solid. Confirmed by LCMS, LCMS: m/z 316.3 [M+H]+.

To a stirred solution of 2-(4-fluorophenyl)-3-(pyridin-4-yl)-4-vinylpyrazolo[1,5-a]pyridine (**R**) (0.200 g, 0.63 mmol, 1.0 eq) in 1,4-dioxane and water (3:1) (6 mL), OsO4 (0.031 mL, 0.06 mmol, 0.1 eq) and NMO (5 mL) were added at 0°C. The reaction mixture was stirred for 4 h at same temperature. After consumption of the starting material, NaIO4 (0.270 g, 1.26 mmol, 2.0 eq) was added at 0°C. Then it was stirred on rt for 16 h. The reaction mixture was quenched with ice-cold water (20 mL) and extracted with EtOAc (2 X 15 mL). The organic layer was concentrated to afford crude, 2-(4-fluorophenyl)-3-(pyridin-4-yl)pyrazolo[1,5-a]pyridine-4-carbaldehyde (0.217 g). LCMS: m/z 318.3 [M+H]+.

To a stirred solution of 2-(4-fluorophenyl)-3-(pyridin-4-yl)pyrazolo[1,5-a]pyridine-4-carbaldehyde (0.210 g, 0.66 mmol, 1.0 eq) in dry MeOH, NH2OH.HCl (0.054 g, 0.79 mmol, 1.2 eq) and AcOH (0.02 mL) were added at rt. Then the reaction mixture was stirred on rt for 4 h. The reaction mixture was quenched with ice-cold water (20 mL) and extracted with EtOAc (2 X 15 mL). The organic layer was concentrated to afford (E)-2-(4-fluorophenyl)-3-(pyridin-4-yl)pyrazolo[1,5-a]pyridine-4-carbaldehyde oxime (0.240 g) as a crude.

To a stirred solution of crude (E)-2-(4-fluorophenyl)-3-(pyridin-4-yl)pyrazolo[1,5-a]pyridine-4-carbaldehyde oxime (0.240 g, 0.72 mmol, 1.0 eq) in CH2Cl2 (15 mL), POCl3 (0.6 mL) was added at 0°C. The reaction was stirred at rt for 6 hThe reaction mixture was quenched with cold water (10 mL), neutralized with NaHCO₃ (10 mL), and extracted with EtOAc (2 × 15 mL). The organic layer was concentrated to afford the crude product, which was purified by preparative HPLC using 0.1% FA in water and acetonitrile on a SUNFIRE C18 (250 × 19 mm, 5 µm) column with a flow rate of 17 mL/min. The pure fraction was lyophilized to yield 2-(4-fluorophenyl)-3-(pyridin-4-yl)pyrazolo[1,5-a]pyridine-4-carbonitrile (**2o**) (0.038 g, 18% yield) as a white solid. mp 174°C; 1H NMR (400 MHz, DMSO-d6) δ: 9.19 (d, *J* = 8.0 Hz, 1H), 8.65 (t, *J* = 8.0 Hz, 2H), 8.06 (d, *J* = 8.0 Hz, 1H), 7.52 – 7.44 (m, 4H), 7.28 – 7.16 (m, 3H). 13C NMR (100 MHz, DMSO-d6) δ 163.88 (d, *J* = 177.0 Hz), 139.32, 135.78, 135.49, 134.44, 131.07 (d, *J* = 8.1 Hz), 128.29, 127.04, 116.18 (d, *J* = 21.7 Hz), 115.13, 112.73, 108.70, 101.09. LCMS-ESI+ (m/z): [M+H]+ Calculated for C19H11FN4 = 314.32; found = 315.2. HRMS-ESI+ (m/z): [M+H]+ Calculated for C19H11FN4 = 315.1046; found = 315.1039. HPLC Purity >97%.

**2.3 Characterization spectra of GW and its bio-isosteres**

1H NMR (400 MHz, CDCl3) of 1-(4-fluorophenyl)-2-(pyridin-4-yl)ethan-1-one

19F NMR (376 MHz, CDCl3) of 1-(4-fluorophenyl)-2-(pyridin-4-yl)ethan-1-one

13C NMR (101 MHz, cdcl3) of 1-(4-fluorophenyl)-2-(pyridin-4-yl)ethan-1-one

1H NMR (400 MHz, CD3OD) of 2-bromo-1-(4-fluorophenyl)-2-(pyridin-4-yl)ethan-1-one

19F NMR (376 MHz, CD3OD) of 2-bromo-1-(4-fluorophenyl)-2-(pyridin-4-yl)ethan-1-one

1H NMR (850 MHz, DMSO-d6) of *2-(4-fluorophenyl)-7-methyl-3-(pyridin-4-yl)imidazo[1,2-a]pyridine* (**1a**)

19F NMR (376 MHz, DMSO-d6) of *2-(4-fluorophenyl)-7-methyl-3-(pyridin-4-yl)imidazo[1,2-a]pyridine* (**1a**)

13C NMR (214 MHz, DMSO-d6) of *2-(4-fluorophenyl)-7-methyl-3-(pyridin-4-yl)imidazo[1,2-a]pyridine* (**1a**)

1H NMR (850 MHz, DMSO-d6) *of 2-(4-fluorophenyl)-7-methoxy-3-(pyridin-4-yl)imidazo[1,2-a]pyridine* (**1b**)

13C NMR (214 MHz, DMSO-d6) *of 2-(4-fluorophenyl)-7-methoxy-3-(pyridin-4-yl)imidazo[1,2-a]pyridine* (**1b**)

19F NMR (376 MHz, CDCl3) *of 2-(4-fluorophenyl)-7-methoxy-3-(pyridin-4-yl)imidazo[1,2-a]pyridine* (**1b**)

*HRMS of 2-(4-fluorophenyl)-7-methoxy-3-(pyridin-4-yl)imidazo[1,2-a]pyridine* (**1b**)

1H NMR (400 MHz, CDCl3) *of 7-(tert-butyl)-2-(4-fluorophenyl)-3-(pyridin-4-yl)imidazo[1,2-a]pyridine* (**1c**)

19F NMR (376 MHz, CDCl3) of *7-(tert-butyl)-2-(4-fluorophenyl)-3-(pyridin-4-yl)imidazo[1,2-a]pyridine* (**1c**)

13C NMR (101 MHz, CDCl3) of *7-(tert-butyl)-2-(4-fluorophenyl)-3-(pyridin-4-yl)imidazo[1,2-a]pyridine* (**1c**)

HRMS of *7-(tert-butyl)-2-(4-fluorophenyl)-3-(pyridin-4-yl)imidazo[1,2-a]pyridine* (**1c**)

1H NMR (400 MHz, CDCl3) *of 7-ethyl-2-(4-fluorophenyl)-3-(pyridin-4-yl)imidazo[1,2-a]pyridine* (**1d**)

19F NMR (376 MHz, CDCl3) *of 7-ethyl-2-(4-fluorophenyl)-3-(pyridin-4-yl)imidazo[1,2-a]pyridine* (**1d**)

13C NMR (100 MHz, DMSO) *of 7-ethyl-2-(4-fluorophenyl)-3-(pyridin-4-yl)imidazo[1,2-a]pyridine* (**1d**)

1H NMR (400 MHz, CDCl3) of *2-(4-fluorophenyl)-3-(pyridin-4-yl)imidazo[1,2-a]pyridine-7-carbonitrile* (**1e**)

19F NMR (376 MHz, CDCl3) of *2-(4-fluorophenyl)-3-(pyridin-4-yl)imidazo[1,2-a]pyridine-7-carbonitrile* (**1e**)

13C NMR (214 MHz, DMSO) of *2-(4-fluorophenyl)-3-(pyridin-4-yl)imidazo[1,2-a]pyridine-7-carbonitrile* (**1e**)

HRMS of *2-(4-fluorophenyl)-3-(pyridin-4-yl)imidazo[1,2-a]pyridine-7-carbonitrile* (**1e**)

1H NMR (400 MHz, CDCl3) *of 7-fluoro-2-(4-fluorophenyl)-3-(pyridin-4-yl)imidazo[1,2-a]pyridine* (**1f**)

19F NMR (376 MHz, CDCl3) *of 7-fluoro-2-(4-fluorophenyl)-3-(pyridin-4-yl)imidazo[1,2-a]pyridine* (**1f**)

13C NMR (126 MHz, DMSO) *of 7-fluoro-2-(4-fluorophenyl)-3-(pyridin-4-yl)imidazo[1,2-a]pyridine* (**1f**)

1H NMR (400 MHz, CDCl3) *of 2-(4-fluorophenyl)-3-(pyridin-4-yl)-7-(trifluoromethyl)imidazo[1,2-a]pyridine* (**1g**)

19F NMR (376 MHz, CDCl3) *of 2-(4-fluorophenyl)-3-(pyridin-4-yl)-7-(trifluoromethyl)imidazo[1,2-a]pyridine* (**1g**)

13C NMR (101 MHz, CDCl3) *of 2-(4-fluorophenyl)-3-(pyridin-4-yl)-7-(trifluoromethyl)imidazo[1,2-a]pyridine* (**1g**)

HRMS *of 2-(4-fluorophenyl)-3-(pyridin-4-yl)-7-(trifluoromethyl)imidazo[1,2-a]pyridine* (**1g**)

1H NMR (400 MHz, CDCl3) *of 7-cyclopropyl-2-(4-fluorophenyl)-3-(pyridin-4-yl)imidazo[1,2-a]pyridine* (**1h**)

19F NMR (376 MHz, CDCl3) *of 7-cyclopropyl-2-(4-fluorophenyl)-3-(pyridin-4-yl)imidazo[1,2-a]pyridine* (**1h**)

13C NMR (214 MHz, DMSO) *of 7-cyclopropyl-2-(4-fluorophenyl)-3-(pyridin-4-yl)imidazo[1,2-a]pyridine* (**1h**)

HRMS *of 7-cyclopropyl-2-(4-fluorophenyl)-3-(pyridin-4-yl)imidazo[1,2-a]pyridine* (**1h**)

1H NMR (400 MHz, CDCl3)*of 2-(4-fluorophenyl)-7-propyl-3-(pyridin-4-yl)imidazo[1,2-a]pyridine* (**1i**)

19F NMR (376 MHz, CDCl3) *of 2-(4-fluorophenyl)-7-propyl-3-(pyridin-4-yl)imidazo[1,2-a]pyridine* (**1i**)

13C NMR (214 MHz, DMSO) *of 2-(4-fluorophenyl)-7-propyl-3-(pyridin-4-yl)imidazo[1,2-a]pyridine* (**1i**)

HRMS *of 2-(4-fluorophenyl)-7-propyl-3-(pyridin-4-yl)imidazo[1,2-a]pyridine* (**1i**)

1H NMR (400 MHz, DMSO-d6) of 2-(4-Fluorophenyl)-6-methyl-3-(pyridine-4-yl)pyrazolo[1,5-a]pyridine (**GW**)

13C NMR (100 MHz, CDCl3) of 2-(4-Fluorophenyl)-6-methyl-3-(pyridine-4-yl)pyrazolo[1,5-a]pyridine (**GW**)

HRMS of 2-(4-Fluorophenyl)-6-methyl-3-(pyridine-4-yl)pyrazolo[1,5-a]pyridine (**GW**)

HPLC of 2-(4-Fluorophenyl)-6-methyl-3-(pyridine-4-yl)pyrazolo[1,5-a]pyridine (**GW**)

1H NMR (400 MHz, DMSO-d6) *of 2-(4-Fluorophenyl)-3-(pyridin-4-yl)pyrazolo[1,5-a]pyridine-6-carbonitrile* (**2a**)

13C NMR (100 MHz, CDCl3) *of 2-(4-Fluorophenyl)-3-(pyridin-4-yl)pyrazolo[1,5-a]pyridine-6-carbonitrile* (**2a**)

HRMS *of 2-(4-Fluorophenyl)-3-(pyridin-4-yl)pyrazolo[1,5-a]pyridine-6-carbonitrile* (**2a**)

HPLC *of 2-(4-Fluorophenyl)-3-(pyridin-4-yl)pyrazolo[1,5-a]pyridine-6-carbonitrile* (**2a**)

1H NMR (400 MHz, DMSO-d6) of 6-fluoro-2-(4-fluorophenyl)-3-(pyridin-4-yl)pyrazolo[1,5-a]pyridine (**2b**)

19F NMR (376 MHz, DMSO-d6) of 6-fluoro-2-(4-fluorophenyl)-3-(pyridin-4-yl)pyrazolo[1,5-a]pyridine (**2b**)

13C NMR (100 MHz, DMSO-d6) of 6-fluoro-2-(4-fluorophenyl)-3-(pyridin-4-yl)pyrazolo[1,5-a]pyridine (**2b**)

HRMS of 6-fluoro-2-(4-fluorophenyl)-3-(pyridin-4-yl)pyrazolo[1,5-a]pyridine (**2b**)

HPLC of 6-fluoro-2-(4-fluorophenyl)-3-(pyridin-4-yl)pyrazolo[1,5-a]pyridine (**2b**)

1H NMR (400 MHz, DMSO-d6) of 2-(4-Fluorophenyl)-3-(pyridin-4-yl)-6-(trifluoromethyl) pyrazolo[1,5-a] pyridine (**2c**)

19F NMR (376 MHz, CDCl3) 2-(4-Fluorophenyl)-3-(pyridin-4-yl)-6-(trifluoromethyl) pyrazolo[1,5-a] pyridine (**2c**)

13C NMR (100 MHz, CDCl3) of 2-(4-Fluorophenyl)-3-(pyridin-4-yl)-6-(trifluoromethyl) pyrazolo[1,5-a] pyridine (**2c**)

HRMS of 2-(4-Fluorophenyl)-3-(pyridin-4-yl)-6-(trifluoromethyl) pyrazolo[1,5-a] pyridine (**2c**)

HPLC of 2-(4-Fluorophenyl)-3-(pyridin-4-yl)-6-(trifluoromethyl) pyrazolo[1,5-a] pyridine (**2c**)

1H NMR (400 MHz, DMSO-d6) of 2-(4-Fluorophenyl)-6-methoxy-3-(pyridin-4-yl) pyrazolo[1,5-a] pyridine (**2d**)

13C NMR (100 MHz, CDCl3) of 2-(4-Fluorophenyl)-6-methoxy-3-(pyridin-4-yl) pyrazolo[1,5-a] pyridine (**2d**)

HRMS of 2-(4-Fluorophenyl)-6-methoxy-3-(pyridin-4-yl) pyrazolo[1,5-a] pyridine (**2d**)

HPLC of 2-(4-Fluorophenyl)-6-methoxy-3-(pyridin-4-yl) pyrazolo[1,5-a] pyridine (**2d**)

1H NMR (400 MHz, DMSO-d6) of *2-(4-Fluorophenyl)-3-(pyridin-4-yl) pyrazolo[1,5-a] pyridin-6-ol* (**2e**)

13C NMR (100 MHz, DMSO-d6) of *2-(4-Fluorophenyl)-3-(pyridin-4-yl) pyrazolo[1,5-a] pyridin-6-ol* (**2e**)

*HRMS of 2-(4-Fluorophenyl)-3-(pyridin-4-yl) pyrazolo[1,5-a] pyridin-6-ol* (**2e**)

*HPLC of 2-(4-Fluorophenyl)-3-(pyridin-4-yl) pyrazolo[1,5-a] pyridin-6-ol* (**2e**)

1H NMR (400 MHz, CDCl3) of *2-(4-Fluorophenyl)-5-methyl-3-(pyridin-4-yl)pyrazolo[1,5-a]pyridine* (**2f**)

13C NMR (100 MHz, DMSO-d6) of *2-(4-Fluorophenyl)-5-methyl-3-(pyridin-4-yl)pyrazolo[1,5-a]pyridine* (**2f**)

*HRMS of 2-(4-Fluorophenyl)-5-methyl-3-(pyridin-4-yl)pyrazolo[1,5-a]pyridine* (**2f**)

*HPLC of 2-(4-Fluorophenyl)-5-methyl-3-(pyridin-4-yl)pyrazolo[1,5-a]pyridine* (**2f**)

of *2-(4-fluorophenyl)-3-(pyridin-4-yl)pyrazolo[1,5-a]pyridine-5-carbonitrile* (**2g**)

of *2-(4-fluorophenyl)-3-(pyridin-4-yl)pyrazolo[1,5-a]pyridine-5-carbonitrile* (**2g**)

HRMS of *2-(4-fluorophenyl)-3-(pyridin-4-yl)pyrazolo[1,5-a]pyridine-5-carbonitrile* (**2g**)

HPLC of *2-(4-fluorophenyl)-3-(pyridin-4-yl)pyrazolo[1,5-a]pyridine-5-carbonitrile* (**2g**)

1H NMR (400 MHz, DMSO-d6) of *2-(4-Fluorophenyl)-3-(pyridin-4-yl)-5-(trifluoromethyl) pyrazolo [1,5-a] pyridine* (**2h**)

19F NMR (376 MHz, DMSO-d6) of *2-(4-Fluorophenyl)-3-(pyridin-4-yl)-5-(trifluoromethyl) pyrazolo [1,5-a] pyridine* (**2h**)

13C NMR (100 MHz, DMSO-d6) of *2-(4-Fluorophenyl)-3-(pyridin-4-yl)-5-(trifluoromethyl) pyrazolo [1,5-a] pyridine* (**2h**)

*HRMS of 2-(4-Fluorophenyl)-3-(pyridin-4-yl)-5-(trifluoromethyl) pyrazolo [1,5-a] pyridine* (**2h**)

*HPLC of 2-(4-Fluorophenyl)-3-(pyridin-4-yl)-5-(trifluoromethyl) pyrazolo [1,5-a] pyridine* (**2h**)

1H NMR (400 MHz, DMSO-d6) of 2-(4-fluorophenyl)-5-methoxy-3-(pyridin-4-yl) pyrazolo [1,5-a] pyridine (**2i**)

13C NMR (100 MHz, DMSO-d6) of 2-(4-fluorophenyl)-5-methoxy-3-(pyridin-4-yl) pyrazolo [1,5-a] pyridine (**2i**)

HRMS of 2-(4-fluorophenyl)-5-methoxy-3-(pyridin-4-yl) pyrazolo [1,5-a] pyridine (**2i**)

HPLC of 2-(4-fluorophenyl)-5-methoxy-3-(pyridin-4-yl) pyrazolo [1,5-a] pyridine (**2i**)

1H NMR (400 MHz, DMSO-d6) of 5-(tert-butyl)-2-(4-fluorophenyl)-3-(pyridin-4-yl)pyrazolo[1,5-a]pyridine (**2j**)

13C NMR (100 MHz, DMSO-d6) of 5-(tert-butyl)-2-(4-fluorophenyl)-3-(pyridin-4-yl)pyrazolo[1,5-a]pyridine (**2j**)

HRMS of 5-(tert-butyl)-2-(4-fluorophenyl)-3-(pyridin-4-yl)pyrazolo[1,5-a]pyridine (**2j**)

HPLC of 5-(tert-butyl)-2-(4-fluorophenyl)-3-(pyridin-4-yl)pyrazolo[1,5-a]pyridine (**2j**)

1H NMR (400 MHz, DMSO-d6) of *2-(4-Fluorophenyl)-3-(pyridin-4-yl)pyrazolo[1,5-a]pyridin-5-ol* **(2k)**

13C NMR (100 MHz, DMSO-d6) of *2-(4-Fluorophenyl)-3-(pyridin-4-yl)pyrazolo[1,5-a]pyridin-5-ol* **(2k)**

*HRMS of 2-(4-Fluorophenyl)-3-(pyridin-4-yl)pyrazolo[1,5-a]pyridin-5-ol* **(2k)**

*HPLC of 2-(4-Fluorophenyl)-3-(pyridin-4-yl)pyrazolo[1,5-a]pyridin-5-ol* **(2k)**

1H NMR (400 MHz, DMSO-d6) of 2-(4-Fluorophenyl)-4-methyl-3-(pyridin-4-yl) pyrazolo [1,5-a] pyridine (**2l**)

13C NMR (100 MHz, CDCl3) of 2-(4-Fluorophenyl)-4-methyl-3-(pyridin-4-yl) pyrazolo [1,5-a] pyridine (**2l**)

HRMS of 2-(4-Fluorophenyl)-4-methyl-3-(pyridin-4-yl) pyrazolo [1,5-a] pyridine (**2l**)

HPLC of 2-(4-Fluorophenyl)-4-methyl-3-(pyridin-4-yl) pyrazolo [1,5-a] pyridine (**2l**)

1H NMR (400 MHz, DMSO-d6) of 4-fluoro-2-(4-fluorophenyl)-3-(pyridin-4-yl)pyrazolo[1,5-a]pyridine (**2m**)

19F NMR (376 MHz, DMSO-d6) of 4-fluoro-2-(4-fluorophenyl)-3-(pyridin-4-yl)pyrazolo[1,5-a]pyridine (**2m**)

13C NMR (100 MHz, DMSO-d6) of 4-fluoro-2-(4-fluorophenyl)-3-(pyridin-4-yl)pyrazolo[1,5-a]pyridine (**2m**)

HRMS of 4-fluoro-2-(4-fluorophenyl)-3-(pyridin-4-yl)pyrazolo[1,5-a]pyridine (**2m**)

HPLC of 4-fluoro-2-(4-fluorophenyl)-3-(pyridin-4-yl)pyrazolo[1,5-a]pyridine (**2m**)

1H NMR (400 MHz, DMSO-d6) of 2-(4-fluorophenyl)-4-methoxy-3-(pyridin-4-yl) pyrazolo[1,5-a] pyridine (**2n**)

13C NMR (100 MHz, CDCl3) of 2-(4-fluorophenyl)-4-methoxy-3-(pyridin-4-yl) pyrazolo[1,5-a] pyridine (**2n**)

HRMS of 2-(4-fluorophenyl)-4-methoxy-3-(pyridin-4-yl) pyrazolo[1,5-a] pyridine (**2n**)

HPLC of 2-(4-fluorophenyl)-4-methoxy-3-(pyridin-4-yl) pyrazolo[1,5-a] pyridine (**2n**)

NMR (400 MHz, DMSO-d6) of *2-(4-fluorophenyl)-3-(pyridin-4-yl)pyrazolo[1,5-a]pyridine-4-carbonitrile* (**2o**)

13C NMR (100 MHz, DMSO-d6) of *2-(4-fluorophenyl)-3-(pyridin-4-yl)pyrazolo[1,5-a]pyridine-4-carbonitrile*

(**2o**)

*HRMS of 2-(4-fluorophenyl)-3-(pyridin-4-yl)pyrazolo[1,5-a]pyridine-4-carbonitrile* (**2o**)

*HPLC of 2-(4-fluorophenyl)-3-(pyridin-4-yl)pyrazolo[1,5-a]pyridine-4-carbonitrile* (**2o**)

**References**

1. References for methyketone formation, bromination, and cyclization: (a) Miwatashi S, Arikawa Y, Naruo K, Igaki K, Watanabe Y, Kimura H, Kawamoto T, Ohkawa S. Synthesis and biological activities of 4-phenyl-5-pyridyl-1,3-thiazole derivatives as p38 MAP kinase inhibitors. *Chem Pharm Bull (Tokyo).* **2005** Apr;53(4):410-8. doi: 10.1248/cpb.53.410. PMID: 15802841. (b) Dhairya Bhavsar, Shailesh Thakrar, Shrey Parekh, Jignesh Lunagariya, Abhay Bavishi, Hardevsinh Vala, Ashish Radadiya, Dilip Detroja and Anamik Shah, An efficient synthesis of highly functionalized imidazoles and thiazoles under microwave irradiation, Chemistry & Biology Interface, **2011**, 1, 2, 251-262. (c) Hari S. Patel, James A. Linn, David H. Drewry, Daniel A. Hillesheim, William J. Zuercher, William J. Hoekstra, New synthetic approaches to estrogen receptor modulators: imidazo[1,2-a]pyridines, Tetrahedron Letters, Volume 44, Issue 21, **2003**, Pages 4077-4080, <https://doi.org/10.1016/S0040-4039(03)00875-X>. [↑](#endnote-ref-1)
2. Caplan T, Lorente-Macías Á, Stogios PJ, Evdokimova E, Hyde S, Wellington MA, Liston S, Iyer KR, Puumala E, Shekhar-Guturja T, Robbins N, Savchenko A, Krysan DJ, Whitesell L, Zuercher WJ, Cowen LE. Overcoming Fungal Echinocandin Resistance through Inhibition of the Non-essential Stress Kinase Yck2. Cell Chem Biol. **2020** Mar 19;27(3):269-282.e5. doi: 10.1016/j.chembiol.2019.12.008. Epub 2020 Jan 7. PMID: 31924499; PMCID: PMC7093242. [↑](#endnote-ref-2)
