# Supplementary material for: Structure-guided optimization of small molecules targeting the yeast casein kinase, Yck2, as a therapeutic strategy to combat Candida albicans
Source: Research Square preprint supplement (doi:10.21203/rs.3.rs-5524306/v1), 2025-01-08
Supplement: Supplementary file 3 [file 7c23007682ba5a929e73b1f7.docx]

**Table S1: X-ray crystallographic statistics for co structures between *C. albicans* Yck2 and 1e, 1f, 2a and 2b**

| **Structure** | **Yck2 + 1e** | **Yck2 + 1f** | **Yck2 + 2a** | **Yck2 + 2b** |
| --- | --- | --- | --- | --- |
| **PDB code** | **9EDV** | **9EDW** | **9EDX** | **9EDY** |
| *Data collection* | | | | |
| Space group | R 3 | R 3 | R 3 | R 3 |
| Cell dimensions  *a*, *b, c* (Å)  α, β, γ, (°) | 91.99, 91.99, 117.96  90, 90, 120 | 92.18, 92.18, 118.2  90, 90, 120 | 91.71, 91.71, 118.95  90, 90, 120 | 91.49, 91.49, 119.17  90, 90, 120 |
| Resolution, Å | 29.18 – 2.42 | 66.14 – 2.33 | 29.11 – 2.03 | 47.64 – 2.30 |
| R*merge*a | 0.065 (2.903)* | 0.094 (2.113) | 0.059 (2.138) | 0.117 (1.341) |
| R*pim*b | 0.032 (1.437)* | 0.050 (1.277) | 0.029 (1.044) | 0.090 (1.138) |
| CC1/2* | 0.999 (0.374) | 0.980 (0.265) | 1.00 (0.439) | 0.988 (0.321) |
| *I* / σ(*I)* | 15,1 (0.7) | 8.0 (0.9) | 19.2 (1.0) | 5.3 (0.7) |
| Completeness, % | 99.9 (99.9) | 99.9 (100) | 100 (99.9) | 99.9 (99.2) |
| Redundancy | 14.7 (10.1) | 8.9 (7.4) | 10.2 (10.4) | 4.5 (3.3) |
| *Refinement* | | | | |
| Resolution, Å | 29.18 – 2.42 | 66.14 – 2.33 | 29.11 – 2.03 | 47.62 – 2.30 |
| No. unique reflections: working, test | 14202, 625 | 15954, 822 | 24095, 1205 | 16481, 976 |
| *R*work/*R*freec | 23.9/29.4 (43.9/49.0) | 27.0/29.0 (43.2/44.5) | 21.7/23.9 (35.6/34.5) | 20.5/23.8 (34.1/37.0) |
| No. atoms  Protein  Inhibitor  Solvent  Water | 2469  24  1  0 | 2469  23  1  7 | 2469  24  2  77 | 2460  23  3  76 |
| *B*-factors  Protein  Inhibitor  Solvent  Water | 119.1  102.9  106.0  N/A | 99.1  89.3  93.9  72.0 | 71.9  82.1  88.5  69.7 | 69.7  61.8  80.6  65.9 |
| R.m.s. deviations  Bond lengths, Å  Bond angles, ° | 0.003  0.587 | 0.003  0.553 | 0.003  0.513 | 0.002  0.476 |
| Ramachandran plot  Favored, %  Allowed, %  Outliers, % | 92.8  7.2  0 | 94.8  4.9  0.3 | 90.5  9.1  0.4 | 94.4  5.6  0 |

*All values in brackets refer to highest resolution shells.

a*R*merge = ΣhklΣj|*I*hkl.j-*I*hkl|/ΣhklΣj*I*hk,j, where *I*hkl,j and〈*I*hk,j〉are the *j*th and mean measurement of the intensity of reflection *j*.

b*R*pim = Σhkl√(n/n-1) Σnj=1|*I*hkl.j-*I*hkl|/ΣhklΣjIhk,j

c*R* = Σ|Fpobs – Fpcalc|/ΣFpobs, where Fpobs and Fpcalc are the observed and calculated structure factor amplitudes, respectively.

**Table S2: Pharmacokinetic parameters of GW, 1e, 1f, 2a and 2b.**


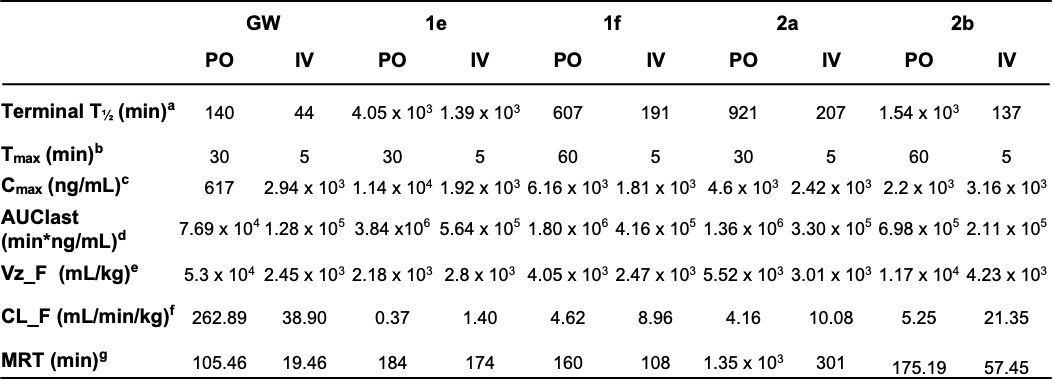


a Time required for the total concentration of molecule to be reduced in mouse plasma by one half. b Time required for drug to reach its maximal concentration. c Maximum drug concentration reached in the plasma. d Area under the time/plasma concentration curve representing total exposure to drug experienced by subjects at the end of the study. e Volume of drug distribution based on terminal elimination phase post-administration. f Total body clearance following administration. g Median residence time. Phoenix 64 WinNonlin 8.3.1.5014 was used to calculate PK parameters.

**Table S3: Strains used in this study**

| **Strain name** | **Strain ID** | **Species** | **Genotype** | **Source** |
| --- | --- | --- | --- | --- |
| CaSS1 | CaLC6106 | *C. albicans* | *ura3::imm434/ura3::imm434 his3::hisG/his3::hisG leu2*::*tetR*-*GAL4AD*- *URA/LEU2* | 1,2 |
| CaSS1 *tetO-YCK2/yck2∆* | GRACE *YCK2* | *C. albicans* | *As CaSS1 tetO-YCK2/yck2::HIS3* | 1,2 |
| DPL15 | CaLC990 | *C. albicans* | Clinical isolate, *FKS1T1922C/ FKS1T1922C* | 3 |
| DPL15 Eno1-GFP | CaLC6194 | *C. albicans* | As DPL15 *ENO1/ENO1*-GFP-NAT | 3,4 |
| SC5314 | CaLC155 | *C. albicans* | Prototrophic | 5 |
| *pTEF1-GFP* | CaLC8737 | *C. albicans* | *SC5314 RPS10::pTEF1-GFP-*SAT1*/RPS10* | This paper |

**References**

1. Roemer T, Jiang B, Davison J, et al. Large-scale essential gene identification in Candida albicans and applications to antifungal drug discovery. *Mol Microbiol*. 2003;50(1):167-181. doi:10.1046/j.1365-2958.2003.03697.x

2. Fu C, Zhang X, Veri AO, et al. Leveraging machine learning essentiality predictions and chemogenomic interactions to identify antifungal targets. *Nat Commun*. 2021;12(1):6497. doi:10.1038/s41467-021-26850-3

3. Singh SD, Robbins N, Zaas AK, Schell WA, Perfect JR, Cowen LE. Hsp90 governs echinocandin resistance in the pathogenic yeast *Candida albicans* via calcineurin. Mitchell AP, ed. *PLoS Pathog*. 2009;5(7):e1000532. doi:10.1371/journal.ppat.1000532

4. Caplan T, Lorente-Macías Á, Stogios PJ, et al. Overcoming fungal echinocandin resistance through inhibition of the non-essential stress kinase Yck2. *Cell Chem Biol*. 2020;27(3):269-282.e5. doi:10.1016/j.chembiol.2019.12.008

5. Jones T, Federspiel NA, Chibana H, et al. The diploid genome sequence of *Candida albicans*. *Proc Natl Acad Sci U S A*. 2004;101(19):7329-7334. doi:10.1073/pnas.0401648101
